# Supplementary material for: Exploring the ring-opening reactions of imidazo[1,5-a]quinolines for the synthesis of imides under photochemical conditions
Source: Royal Society of Chemistry journal article supplement (doi:10.1039/c9ob01227c), 2019-01-01

## Supporting Information

### Exploring the ring-opening reactions of imidazo[1,5-a]quinolines for the synthesis of imides under photochemical conditions

Ya Peng<sup>a</sup>, Cheng-Tao Feng<sup>a,\*</sup>, Yu-Qing Li<sup>a</sup>, Feng-Xiang Chen<sup>a</sup>, Kun Xu<sup>b,\*</sup>

<sup>a</sup>School of Chemical Engineering, Anhui University of Science and Technology, Huainan 232001, China.

<sup>b</sup>Engineering Technology Research Center of Henan Province for Photo- and Electrochemical Catalysis, College of Chemistry and Pharmaceutical Engineering, Nanyang Normal University, Nanyang, 473061, China.

fengct@mail.ustc.edu.cn; xukun@nynu.edu.cn

#### Contents

|                                                             |         |
|-------------------------------------------------------------|---------|
| 1. General Information                                      | S2      |
| 2. General Experimental Procedure                           | S2-S4   |
| 3. Characterization Data of Products                        | S4-S12  |
| 4. Copies of <sup>1</sup> H and <sup>13</sup> C NMR spectra | S13-S36 |

## 1. General Information

$^1\text{H}$ NMR and  $^{13}\text{C}$ NMR spectra were recorded at 400MHz and 100MHz respectively, The data are reported as follows: chemical shift in ppm from internal tetramethylsilane on the  $\delta$  scale, multiplicity (s=singlet, d=doublet, t=triplet, q=quartet, m=multiplet, dd=doublet of doublets), coupling constants (Hz) and integration, using tetramethylsilane (TMS) as internal reference, in  $\text{CDCl}_3$ . High resolution mass spectra was obtained using electrospray ionization (ESI) method on a TOF mass analyzer. Unless otherwise indicated, all commercial reagents and solvents were used without further purification.

## 2. General Experimental Procedure

### 2.1. General Experimental Procedure for the Synthesis of Imides **2**

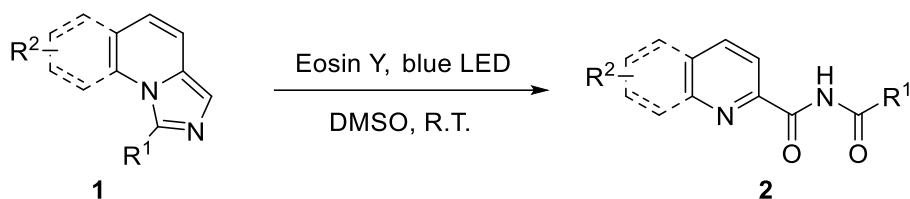

Imidazo[1,5-a]quinoline (**1**, 0.2 mmol), Eosin Y (5.0 mol %), and DMSO (1.5 mL) were added to an oven-dried reaction vessel equipped with a magnetic stir bar, and the reaction vessel was irradiated using 5 W blue LEDs at room temperature under ambient air for 12h. After the reaction was completed, the resulting mixture was extracted with EtOAc, washed by  $\text{H}_2\text{O}$ . The combined organic layers were dried over anhydrous  $\text{Na}_2\text{SO}_4$ . The solvent was removed by evaporation under reduced pressure. Products were purified by flash chromatography on 200–300 mesh silica gels using petroleum ether/ethyl acetate as eluent to afford the pure products **2**.

### 2.2. General Experimental Procedure for the Synthesis of **1**

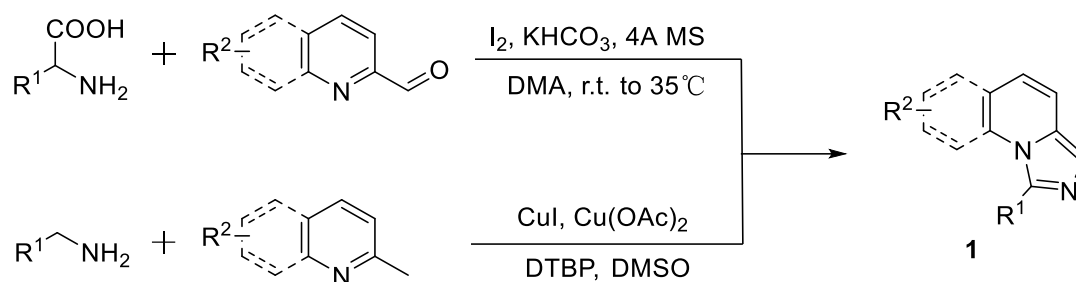

Imidazo[1,5-a]quinolines **1a**, **1b**, **1m-1q** were prepared by using following the reported methodology (*J. Org. Chem.*, 2012, **77**, 11161). L-Phenylglycine (1.84 g, 11 mmol) and potassium bicarbonate (2.00 g, 20 mmol) weighed into a 100 mL round bottom flask, followed by DMA (30 mL). Then, 2-quinolinecarboxaldehyde (0.95 mL, 10 mmol) was added to this mixture, and finally I<sub>2</sub> (2.54g, 10 mmol) was added under stirring. The reaction is carried out under nitrogen atmosphere at room temperature for 12 h. The reaction process was monitored by TLC. After the reaction was completed, the resulting mixture was extracted with EtOAc and dried over anhydrous Na<sub>2</sub>SO<sub>4</sub>. The solvent was removed by evaporation under reduced pressure. Products were purified by flash chromatography on 200–300 mesh silica gels using petroleum ether/ethyl acetate as the eluent.

Other imidazo[1,5-a]quinolines were prepared by using following the reported methodology (*J. Org. Chem.*, 2016, **81**, 4386). CuI (38.1 mg, 0.2 mmol) and Cu(OAc)<sub>2</sub> · H<sub>2</sub>O (39.9 mg, 0.2 mmol) was dissolved in a reaction tube using 1.5 mL of DMSO, and then benzylamine (65.6 μL, 0.6 mmol), 2-methylquinoline (27.1 μL, 0.2 mmol) and DTBP (73.3 μL, 0.4 mmol) were added, sequentially. The mixture was stirred at 110 °C for 24 h, and the reaction process was monitored by TLC. After the reaction was completed, The reaction system was allowed to attain room temperature and extracted with ethyl acetate (3 × 20 mL), and then the organic layer was washed with brine (2 × 10 mL) and dried with anhydrous Na<sub>2</sub>SO<sub>4</sub>. Subsequently, the solvent was removed under reduced pressure and the remaining crud product was purified by column chromatography over silica gel.

### 2.3. UV Characterization Data of 1a

The ultraviolet spectra of the **1a** and **1a** : TFA = 1:1 were recorded on a SHIMADZU Model 2550 UV-visible spectrophotometer (600 to 230 nm). The absorbances and  $\epsilon$  of the samples was recorded at 312 nm, red-shift occurred in the addition of TFA and the absorbances and  $\epsilon$  of the samples was recorded at 309 nm.

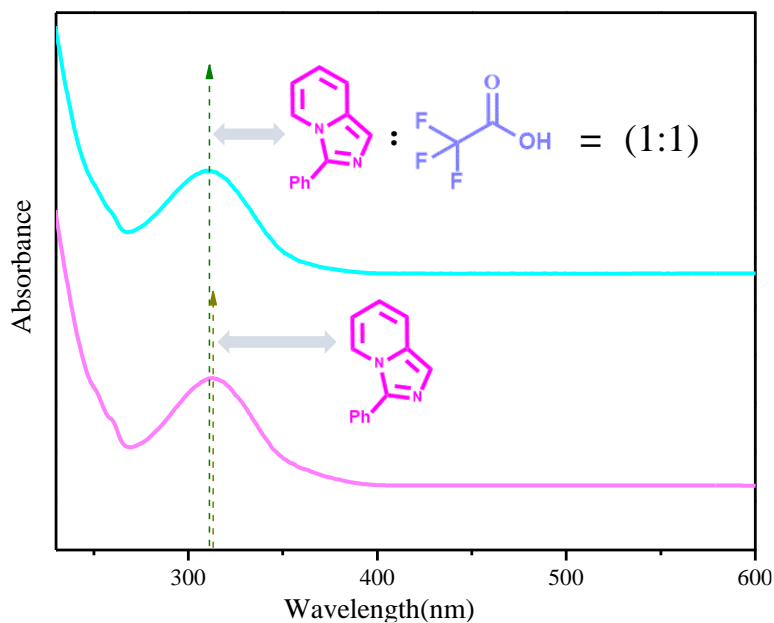

### 3. Characterization Data of Products

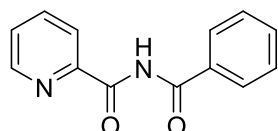

N-benzoylpicolinamide (**2a**): 85% yield; pale yellow solid;  $^1\text{H}$  NMR (400 MHz,  $\text{CDCl}_3$ )  $\delta$  11.53 (s, 1H), 8.66-8.64 (m, 1H), 8.33 (d,  $J=7.8$  Hz, 1H), 8.00-7.93 (m, 3H), 7.64-7.52 (m, 4H);  $^{13}\text{C}$  NMR (100 MHz,  $\text{CDCl}_3$ )  $\delta$  164.8, 161.9, 148.5, 148.3, 138.0, 133.4, 133.0, 128.9, 127.8, 127.7, 123.3; HRMS (ESI): calcd for  $\text{C}_{13}\text{H}_{11}\text{N}_2\text{O}_2$   $[\text{M}+\text{H}]^+$  227.0821, found 227.0823.

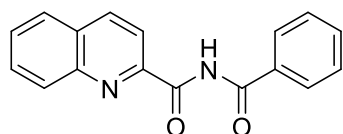

N-benzoylquinoline-2-carboxamide (**2b**): 94% yield; pale yellow solid;  $^1\text{H}$  NMR (400 MHz,  $\text{CDCl}_3$ )  $\delta$  11.75 (s, 1H), 8.39 (s, 2H), 8.19 (d,  $J=8.5$  Hz, 1H), 8.07-8.05(m, 2H),

7.93 (d,  $J=7.8$  Hz, 1H), 7.85-7.81 (m, 1H), 7.71-7.64 (m, 2H), 7.60-7.56 (m, 2H);  $^{13}\text{C}$  NMR (100 MHz,  $\text{CDCl}_3$ )  $\delta$  164.9, 162.1, 148.2, 146.1, 138.3, 133.5, 133.1, 130.7, 129.9, 129.9, 129.0, 128.9, 127.9, 127.9, 118.9; HRMS (ESI): calcd for  $\text{C}_{17}\text{H}_{13}\text{N}_2\text{O}_2$   $[\text{M}+\text{H}]^+$  277.0977, found 277.0979.

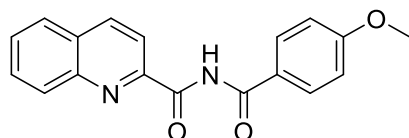

N-(4-methoxybenzoyl)quinoline-2-carboxamide (**2c**): 76% yield; pale yellow solid;  $^1\text{H}$  NMR (400 MHz,  $\text{CDCl}_3$ )  $\delta$  11.66 (s, 1H), 8.38 (s, 2H), 8.19 (d,  $J=8.5$  Hz, 1H), 8.05-8.01 (m, 2H), 7.94-7.91 (m, 1H), 7.85-7.80 (m, 1H), 7.70-7.66 (m, 1H), 7.06-7.02 (m, 2H), 3.90 (s, 3H);  $^{13}\text{C}$  NMR (100 MHz,  $\text{CDCl}_3$ )  $\delta$  164.2, 163.5, 162.1, 148.5, 146.1, 138.2, 130.6, 130.0, 129.9, 129.8, 128.8, 127.9, 125.8, 118.9, 114.2, 55.5; HRMS (ESI): calcd for  $\text{C}_{18}\text{H}_{15}\text{N}_2\text{O}_3$   $[\text{M}+\text{H}]^+$  307.1083, found 307.1080.

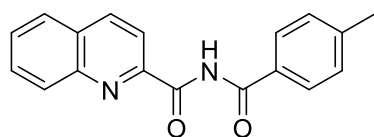

N-(4-methylbenzoyl)quinoline-2-carboxamide (**2d**): 85% yield; yellowish solid;  $^1\text{H}$  NMR (400 MHz,  $\text{CDCl}_3$ )  $\delta$  11.71 (s, 1H), 8.39 (s, 2H), 8.18 (d,  $J=8.5$  Hz, 1H), 7.97-7.92 (m, 3H), 7.85-7.81 (m, 1H), 7.71-7.67 (m, 1H), 7.38-7.36 (m, 2H), 2.47 (s, 3H);  $^{13}\text{C}$  NMR (100 MHz,  $\text{CDCl}_3$ )  $\delta$  164.8, 162.1, 148.4, 146.1, 143.9, 138.3, 130.8, 130.6, 129.9, 129.8, 129.6, 128.9, 127.9, 127.9, 118.9, 21.6; HRMS (ESI): calcd for  $\text{C}_{18}\text{H}_{15}\text{N}_2\text{O}_2$   $[\text{M}+\text{H}]^+$  291.1134, found 291.1139.

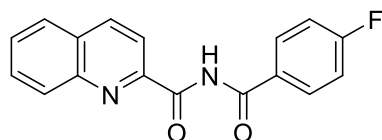

N-(4-fluorobenzoyl)quinoline-2-carboxamide (**2e**): 73% yield; pale yellow solid;  $^1\text{H}$  NMR (400 MHz,  $\text{CDCl}_3$ )  $\delta$  11.68 (s, 1H), 8.42-8.37 (m, 2H), 8.20 (d,  $J=8.5$  Hz, 1H), 8.11-8.06 (m, 2H), 7.95 (d,  $J=8.2$  Hz, 1H), 7.87-7.83 (m, 1H), 7.73-7.69 (m, 1H), 7.28

-7.23 (m, 2H);  $^{13}\text{C}$  NMR (100 MHz,  $\text{CDCl}_3$ )  $\delta$  165.7 (d,  $J = 254.7$  Hz), 164.0, 162.1, 148.2, 146.1, 138.4, 130.7, 130.5 (d,  $J = 9.3$  Hz), 130.0, 129.8, 129.8 (d,  $J = 3.1$  Hz), 129.0, 127.9, 118.9, 116.1 (d,  $J = 22.1$  Hz). HRMS (ESI): calcd for  $\text{C}_{17}\text{H}_{12}\text{FN}_2\text{O}_2$   $[\text{M}+\text{H}]^+$  295.0883, found 295.0881.

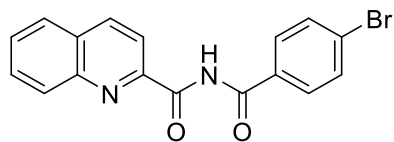

N-(4-bromobenzoyl)quinoline-2-carboxamide (**2f**): 78% yield; pale yellow solid;  $^1\text{H}$  NMR (400 MHz,  $\text{CDCl}_3$ )  $\delta$  11.67 (s, 1H), 8.42-8.36 (m, 2H), 8.18 (d,  $J=8.5$  Hz, 1H), 7.95-7.89 (m, 3H), 7.86-7.82 (m, 1H), 7.73-7.68 (m, 3H);  $^{13}\text{C}$  NMR (100 MHz,  $\text{CDCl}_3$ )  $\delta$  164.3, 162.0, 148.1, 146.1, 138.4, 132.4, 132.2, 130.8, 130.0, 129.8, 129.5, 129.0, 128.1, 127.9, 118.9; HRMS (ESI): calcd for  $\text{C}_{17}\text{H}_{12}\text{BrN}_2\text{O}_2$   $[\text{M}+\text{H}]^+$  355.0082, found 355.0086.

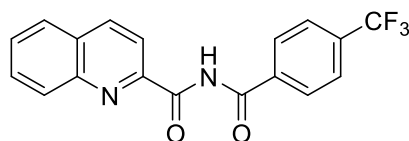

N-(4-(trifluoromethyl)benzoyl)quinoline-2-carboxamide (**2g**): 80% yield; pale yellow solid;  $^1\text{H}$  NMR (400 MHz,  $\text{CDCl}_3$ )  $\delta$  11.73 (s, 1H), 8.43-8.37 (m, 2H), 8.19 (d,  $J=8.5$  Hz, 1H), 8.15-8.13 (m, 2H), 7.95 (d,  $J=8.1$  Hz, 1H), 7.87-7.83 (m, 3H), 7.72 (t,  $J=7.2$  Hz, 1H);  $^{13}\text{C}$  NMR (101 MHz,  $\text{CDCl}_3$ )  $\delta$  164.2, 162.1, 147.9, 146.1, 138.5, 136.8, 134.5 (q,  $J = 32.9$  Hz), 130.8, 130.0, 129.8, 129.1, 128.4, 127.9, 126.0 (q,  $J = 3.7$  Hz), 123.5 (d,  $J = 272.8$  Hz), 118.9. HRMS (ESI): calcd for  $\text{C}_{18}\text{H}_{12}\text{F}_3\text{N}_2\text{O}_2$   $[\text{M}+\text{H}]^+$  345.0851, found 345.0854.

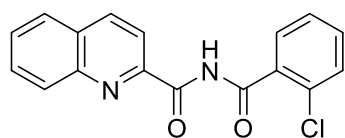

N-(2-chlorobenzoyl)quinoline-2-carboxamide (**2h**): 77% yield; pale yellow solid;  $^1\text{H}$  NMR (400 MHz,  $\text{CDCl}_3$ )  $\delta$  11.52 (s, 1H), 8.37 (d,  $J=8.5$  Hz, 1H), 8.30 (d,  $J=8.5$  Hz, 1H), 8.16 (d,  $J=8.6$  Hz, 1H), 7.92 (d,  $J=8.2$  Hz, 1H), 7.84-7.80 (m, 1H), 7.75-7.64 (m, 2H), 7.53-7.45 (m, 2H), 7.42 (td,  $J=7.2, 2.0$  Hz, 1H);  $^{13}\text{C}$  NMR (100 MHz,  $\text{CDCl}_3$ )  $\delta$

166.0, 162.1, 147.6, 146.2, 138.2, 134.7, 132.0, 130.8, 130.7, 130.1, 129.9, 129.9, 129.0, 127.8, 127.2, 118.9; HRMS (ESI): calcd for C<sub>17</sub>H<sub>12</sub>ClN<sub>2</sub>O<sub>2</sub> [M+H]<sup>+</sup> 311.0587, found 311.0589.

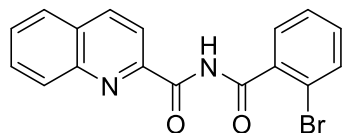

N-(2-bromobenzoyl)quinoline-2-carboxamide (**2i**): 65% yield; pale yellow solid; <sup>1</sup>H NMR (400 MHz, CDCl<sub>3</sub>) δ 11.36 (s, 1H), 8.37 (d, *J*=8.5 Hz, 1H), 8.29 (d, *J*=8.5 Hz, 1H), 8.17 (d, *J*=8.6 Hz, 1H), 7.92 (d, *J*=8.2 Hz, 1H), 7.85-7.81 (m, 1H), 7.71-7.67 (m, 2H), 7.60 (dd, *J*=7.6, 1.7 Hz, 1H), 7.46 (td, *J*=7.5, 1.2 Hz, 1H), 7.39 (td, *J*=7.7, 1.8 Hz, 1H); <sup>13</sup>C NMR (100 MHz, CDCl<sub>3</sub>) δ 167.0, 162.1, 147.5, 146.2, 138.2, 137.3, 133.2, 131.8, 130.7, 129.9, 129.3, 129.0, 127.8, 127.6, 119.0, 118.9; HRMS (ESI): calcd for C<sub>17</sub>H<sub>12</sub>BrN<sub>2</sub>O<sub>2</sub> [M+H]<sup>+</sup> 355.0082, found 355.0087.

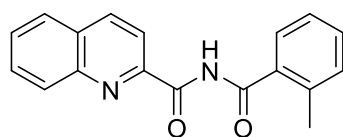

N-(2-methylbenzoyl)quinoline-2-carboxamide (**2j**): 78% yield; pale yellow solid; <sup>1</sup>H NMR (400 MHz, CDCl<sub>3</sub>) δ 11.27 (s, 1H), 8.39-8.34 (m, 2H), 8.14 (d, *J*=8.4 Hz, 1H), 7.93 (d, *J*=8.1 Hz, 1H), 7.83-7.79 (m, 1H), 7.71-7.63 (m, 2H), 7.48-7.44 (m, 1H), 7.37-7.33 (m, 2H), 2.59 (s, 3H); <sup>13</sup>C NMR (100 MHz, CDCl<sub>3</sub>) δ 168.1, 162.2, 148.0, 146.2, 138.2, 137.2, 134.7, 131.5, 131.2, 130.7, 129.9, 129.8, 128.9, 127.8, 127.3, 126.0, 118.9, 20.1; HRMS (ESI): calcd for C<sub>18</sub>H<sub>15</sub>N<sub>2</sub>O<sub>2</sub> [M+H]<sup>+</sup> 291.1134, found 291.1138.

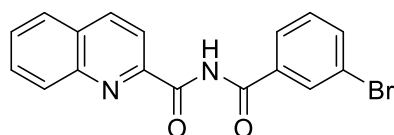

N-(3-bromobenzoyl)quinoline-2-carboxamide (**2k**): 82% yield; pale yellow solid; <sup>1</sup>H NMR (400 MHz, CDCl<sub>3</sub>) δ 11.70 (s, 1H), 8.40 (m, 2H), 8.19 (m, 2H), 8.00-7.69 (m, 5H), 7.46 (s, 1H). <sup>13</sup>C NMR (100 MHz, CDCl<sub>3</sub>) δ 162.6, 161.0, 146.9, 144.9, 137.4,

134.9, 134.4, 130.2, 129.7, 129.4, 129.0, 128.8, 128.0, 126.9, 125.2, 122.1, 117.9.  
HRMS (ESI): calcd for C<sub>17</sub>H<sub>12</sub>BrN<sub>2</sub>O<sub>2</sub> [M+H]<sup>+</sup> 355.0082, found 355.0084.

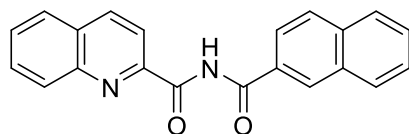

N-(2-naphthoyl)quinoline-2-carboxamide (**2l**): 86% yield; pale yellow solid; <sup>1</sup>H NMR (400 MHz, CDCl<sub>3</sub>) δ 11.48 (s, 1H), 8.48 (d, *J*=8.1 Hz, 1H), 8.39-8.34 (m, 2H), 8.09 (d, *J*=8.6 Hz, 1H), 8.06 (d, *J*=8.3 Hz, 1H), 7.95-7.90 (m, 3H), 7.81-7.77 (m, 1H), 7.70-7.66 (m, 1H), 7.63-7.55 (m, 3H); <sup>13</sup>C NMR (100 MHz, CDCl<sub>3</sub>) δ 167.6, 162.4, 148.0, 146.2, 138.2, 133.8, 132.5, 132.2, 130.7, 130.2, 129.9, 129.8, 128.9, 127.8, 127.8, 126.7, 126.1, 125.0, 124.7, 118.9; HRMS (ESI): calcd for C<sub>21</sub>H<sub>15</sub>N<sub>2</sub>O<sub>2</sub> [M+H]<sup>+</sup> 327.1134, found 327.1132.

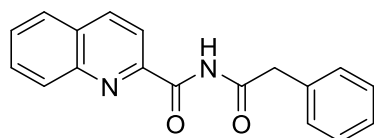

N-(2-phenylacetyl)quinoline-2-carboxamide (**2m**): 63% yield; yellowish solid; <sup>1</sup>H NMR (400 MHz, CDCl<sub>3</sub>) δ 10.84 (s, 1H), 8.36-8.29 (m, 2H), 8.08 (d, *J*=8.5 Hz, 1H), 7.90 (d, *J*=8.2 Hz, 1H), 7.83-7.79 (m, 1H), 7.69-7.65 (m, 1H), 7.43-7.37 (m, 4H), 7.34-7.30 (m, 1H), 4.35 (s, 2H); <sup>13</sup>C NMR (100 MHz, CDCl<sub>3</sub>) δ 172.2, 162.7, 147.6, 146.2, 138.1, 133.7, 130.7, 129.9, 129.8, 128.9, 128.7, 127.7, 127.2, 118.7, 44.0; HRMS (ESI): calcd for C<sub>18</sub>H<sub>15</sub>N<sub>2</sub>O<sub>2</sub> [M+H]<sup>+</sup> 291.1134, found 291.1132.

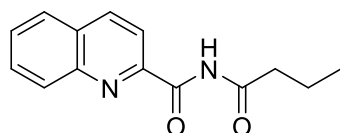

N-butrylquinoline-2-carboxamide (**2n**): 70% yield; pale yellow foam; <sup>1</sup>H NMR (400 MHz, CDCl<sub>3</sub>) δ 10.69 (s, 1H), 8.36 (d, *J*=8.5 Hz, 1H), 8.29 (d, *J*=8.5 Hz, 1H), 8.14 (d, *J*=8.5 Hz, 1H), 7.90 (d, *J*=8.1 Hz, 1H), 7.83-7.79 (m, 1H), 7.69-7.65 (m, 1H), 3.01 (t, *J*=7.4 Hz, 2H), 1.84-1.75 (m, 2H), 1.05 (t, *J*=7.4 Hz, 3H); <sup>13</sup>C NMR (100 MHz, CDCl<sub>3</sub>)



$\delta$  174.8, 162.8, 147.8, 146.2, 138.1, 130.6, 129.9, 129.7, 128.9, 127.7, 118.7, 39.4, 17.6, 13.7; HRMS (ESI): calcd for  $C_{14}H_{15}N_2O_2$   $[M+H]^+$  243.1134, found 243.1135.

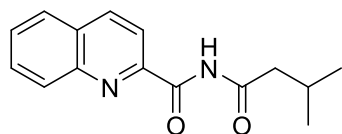

N-(3-methylbutanoyl)quinoline-2-carboxamide (**2o**): 60% yield; pale yellow foam;  $^1H$  NMR (400 MHz,  $CDCl_3$ )  $\delta$  10.69 (s, 1H), 8.36 (d,  $J=8.5$  Hz, 1H), 8.29 (d,  $J=8.5$  Hz, 1H), 8.14 (d,  $J=8.5$  Hz, 1H), 7.90 (d,  $J=8.0$  Hz, 1H), 7.83-7.79 (m, 1H), 7.70-7.66 (m, 1H), 2.92 (d,  $J=6.9$  Hz, 2H), 2.29 (m, 1H), 1.06 (d,  $J=6.7$  Hz, 6H);  $^{13}C$  NMR (100 MHz,  $CDCl_3$ )  $\delta$  174.2, 162.7, 147.8, 146.2, 138.1, 130.7, 129.9, 129.7, 128.9, 127.7, 118.7, 46.2, 24.9, 22.5; HRMS (ESI): calcd for  $C_{15}H_{17}N_2O_2$   $[M+H]^+$  257.1290, found 257.1289.

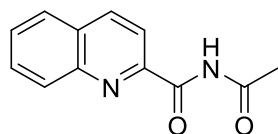

N-acetylquinoline-2-carboxamide (**2p**): 45% yield; pale yellow solid;  $^1H$  NMR (600 MHz,  $CDCl_3$ )  $\delta$  10.72 (s, 1H), 8.37 (d,  $J = 8.5$  Hz, 1H), 8.30 (d,  $J = 8.5$  Hz, 1H), 8.15 (d,  $J = 8.5$  Hz, 1H), 7.91 (d,  $J = 8.2$  Hz, 1H), 7.84-7.81(m, 1H), 7.70-7.67 (m, 1H), 2.67 (s, 3H);  $^{13}C$  NMR (151 MHz,  $CDCl_3$ )  $\delta$  172.1, 163.1, 147.6, 146.2, 138.1, 130.7, 129.9, 129.8, 128.9, 127.7, 118.7, 25.4; HRMS (ESI): calcd for  $C_{12}H_{11}N_2O_2$   $[M+H]^+$  215.0821, found 215.0817.

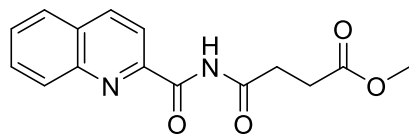

Methyl-4-oxo-4-(quinoline-2-carboxamido)butanoate (**2q**): 65% yield; pale yellow solid;  $^1H$  NMR (600 MHz,  $CDCl_3$ )  $\delta$  10.80 (s, 1H), 8.38 (d,  $J = 8.5$  Hz, 1H), 8.31 (d,  $J = 8.5$  Hz, 1H), 8.16 (d,  $J = 8.5$  Hz, 1H), 7.92 (d,  $J = 8.2$  Hz, 1H), 7.84-7.81 (m, 1H), 7.70-7.68 (m, 1H), 3.72 (s, 3H), 3.39(t,  $J = 6.0$  Hz, 2H), 2.78 (t,  $J = 6.5$  Hz, 2H).  $^{13}C$

NMR (151 MHz, CDCl<sub>3</sub>)  $\delta$  173.8, 173.3, 163.4, 147.9, 146.5, 138.6, 131.2, 130.2, 130.2, 129.4, 128.1, 119.2, 52.3, 33.1, 28.5; HRMS (ESI): calcd for C<sub>15</sub>H<sub>15</sub>N<sub>2</sub>O<sub>4</sub> [M+H]<sup>+</sup> 287.1032, found 287.1026.

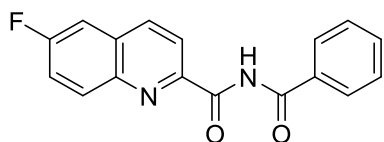

N-benzoyl-6-fluoroquinoline-2-carboxamide (**2r**): 76% yield; pale yellow solid; <sup>1</sup>H NMR (400 MHz, CDCl<sub>3</sub>)  $\delta$  11.63 (s, 1H), 8.41 (d, *J*=8.5 Hz, 1H), 8.35 (d, *J*=8.6 Hz, 1H), 8.21 (dd, *J*=9.1, 5.3 Hz, 1H), 8.05-8.03 (m, 2H), 7.67-7.54 (m, 5H); <sup>13</sup>C NMR (101 MHz, CDCl<sub>3</sub>)  $\delta$  164.9 (s), 161.9 (s), 161.8 (d, *J* = 252 Hz), 147.9 (d, *J* = 3.0 Hz), 143.2 (s), 137.7 (d, *J* = 5.7 Hz), 133.5 (s), 133.1 (s), 132.5 (d, *J* = 9.5 Hz), 130.9 (d, *J* = 10.5 Hz), 129.0 (s), 127.8 (s), 121.3 (d, *J* = 26.2 Hz), 119.7 (s), 111.1 (d, *J* = 22.0 Hz); HRMS (ESI): calcd for C<sub>17</sub>H<sub>12</sub>FN<sub>2</sub>O<sub>2</sub> [M+H]<sup>+</sup> 295.0883, found 295.0881.

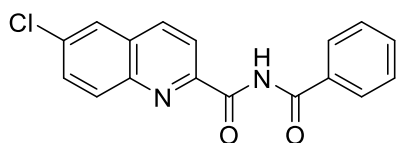

N-benzoyl-6-chloroquinoline-2-carboxamide (**2s**): 85% yield; pale yellow solid; <sup>1</sup>H NMR (400 MHz, CDCl<sub>3</sub>)  $\delta$  11.61 (s, 1H), 8.41 (d, *J*=8.5 Hz, 1H), 8.32 (d, *J*=8.5 Hz, 1H), 8.14 (d, *J*=9.0 Hz, 1H), 8.05-8.03 (m, 2H), 7.92-7.92 (m, 1H), 7.78-7.75 (m, 1H), 7.65 (t, *J*=7.3 Hz, 1H), 7.59-7.56 (m, 2H); <sup>13</sup>C NMR (100 MHz, CDCl<sub>3</sub>)  $\delta$  163.8, 160.7, 147.5, 143.4, 136.4, 133.9, 132.4, 132.1, 130.7, 130.3, 129.4, 127.9, 126.8, 125.5, 118.9; HRMS (ESI): calcd for C<sub>17</sub>H<sub>12</sub>ClN<sub>2</sub>O<sub>2</sub> [M+H]<sup>+</sup> 311.0587, found 311.0585.

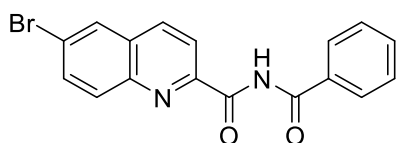

N-benzoyl-6-bromoquinoline-2-carboxamide (**2t**): 90% yield; pale yellow solid; <sup>1</sup>H NMR (400 MHz, CDCl<sub>3</sub>)  $\delta$  11.61 (s, 1H), 8.43 (d, *J*=8.5 Hz, 1H), 8.32 (d, *J*=8.5 Hz, 1H), 8.12-8.04 (m, 4H), 7.90 (dd, *J*=9.0, 1.9 Hz, 1H), 7.66 (t, *J*=7.3 Hz, 1H), 7.60-7.56

(m, 2H);  $^{13}\text{C}$  NMR (100 MHz,  $\text{CDCl}_3$ )  $\delta$  163.8, 160.7, 147.6, 143.6, 136.3, 133.3, 132.4, 132.1, 130.4, 129.8, 128.9, 127.9, 126.8, 122.2, 118.9; HRMS (ESI): calcd for  $\text{C}_{17}\text{H}_{12}\text{BrN}_2\text{O}_2$   $[\text{M}+\text{H}]^+$  355.0082, found 355.0084.

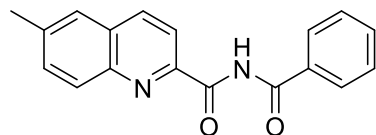

N-benzoyl-6-methylquinoline-2-carboxamide (**2v**): 90% yield; pale yellow solid;  $^1\text{H}$  NMR (400 MHz,  $\text{CDCl}_3$ )  $\delta$  11.72 (s, 1H), 8.33 (d,  $J=8.4$  Hz, 1H), 8.27 (d,  $J=8.4$  Hz, 1H), 8.07-8.04 (m, 3H), 7.67-7.63 (m, 3H), 7.59-7.55 (m, 2H), 2.57 (s, 3H);  $^{13}\text{C}$  NMR (100 MHz,  $\text{CDCl}_3$ )  $\delta$  163.8, 161.2, 146.4, 143.6, 138.3, 136.4, 132.6, 132.0, 132.0, 129.0, 128.4, 127.9, 126.8, 125.6, 117.9, 22.8; HRMS (ESI): calcd for  $\text{C}_{18}\text{H}_{15}\text{N}_2\text{O}_2$   $[\text{M}+\text{H}]^+$  291.1134, found 291.1135.

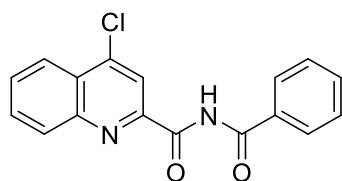

N-benzoyl-4-chloroquinoline-2-carboxamide (**2w**): 78% yield; pale yellow solid;  $^1\text{H}$  NMR (400 MHz,  $\text{CDCl}_3$ )  $\delta$  11.61 (s, 1H), 8.47 (s, 1H), 8.34 (d,  $J=8.4$  Hz, 1H), 8.23 (d,  $J=8.4$  Hz, 1H), 8.07-8.05 (m, 2H), 7.93-7.89 (m, 1H), 7.81 (t,  $J=7.3$  Hz, 1H), 7.67 (t,  $J=7.4$  Hz, 1H), 7.61-7.57 (m, 2H);  $^{13}\text{C}$  NMR (100 MHz,  $\text{CDCl}_3$ )  $\delta$  164.8, 161.2, 148.2, 146.8, 145.2, 133.4, 133.2, 131.5, 130.3, 129.9, 129.0, 128.0, 127.9, 124.5, 119.2; HRMS (ESI): calcd for  $\text{C}_{17}\text{H}_{12}\text{ClN}_2\text{O}_2$   $[\text{M}+\text{H}]^+$  311.0587, found 311.0588.

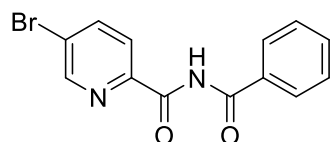

N-benzoyl-5-bromopicolinamide (**2x**): 93% yield; pale yellow solid;  $^1\text{H}$  NMR (400 MHz,  $\text{CDCl}_3$ )  $\delta$  11.27 (s, 1H), 8.71 (d,  $J=1.9$  Hz, 1H), 8.22 (d,  $J=8.3$  Hz, 1H), 8.08 (dd,  $J=8.3, 2.2$  Hz, 1H), 7.98-7.96 (m, 2H), 7.63 (t,  $J=7.4$  Hz, 1H), 7.56-7.52 (m, 2H);  $^{13}\text{C}$

NMR (100 MHz, CDCl<sub>3</sub>)  $\delta$  164.7, 161.2, 149.6, 147.0, 140.8, 133.2, 133.2, 129.0, 127.8, 125.7, 124.6; HRMS (ESI): calcd for C<sub>13</sub>H<sub>10</sub>BrN<sub>2</sub>O<sub>2</sub> [M+H]<sup>+</sup> 304.9926, found 304.9930.

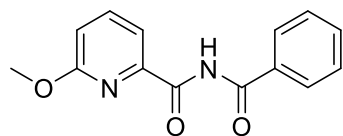

N-benzoyl-6-methoxypicolinamide (**2y**): 75% yield; pale yellow solid; <sup>1</sup>H NMR (400 MHz, CDCl<sub>3</sub>)  $\delta$  11.27(s, 1H), 7.98-7.94 (m, 3H), 7.82 (t, *J*=7.7 Hz, 1H), 7.63 (t, *J*=7.3 Hz, 1H), 7.55-7.51 (m, 2H), 7.04 (d, *J*=8.2 Hz, 1H), 4.06 (s, 3H); <sup>13</sup>C NMR (100 MHz, CDCl<sub>3</sub>)  $\delta$  164.8, 162.9, 161.6, 145.8, 140.3, 133.6, 133.0, 129.0, 127.6, 116.9, 116.2, 53.5; HRMS (ESI): calcd for C<sub>14</sub>H<sub>13</sub>N<sub>2</sub>O<sub>3</sub> [M+H]<sup>+</sup> 257.0926, found 257.0929.

## 4. Copies of $^1\text{H}$ NMR and $^{13}\text{C}$ NMR Spectra

2a

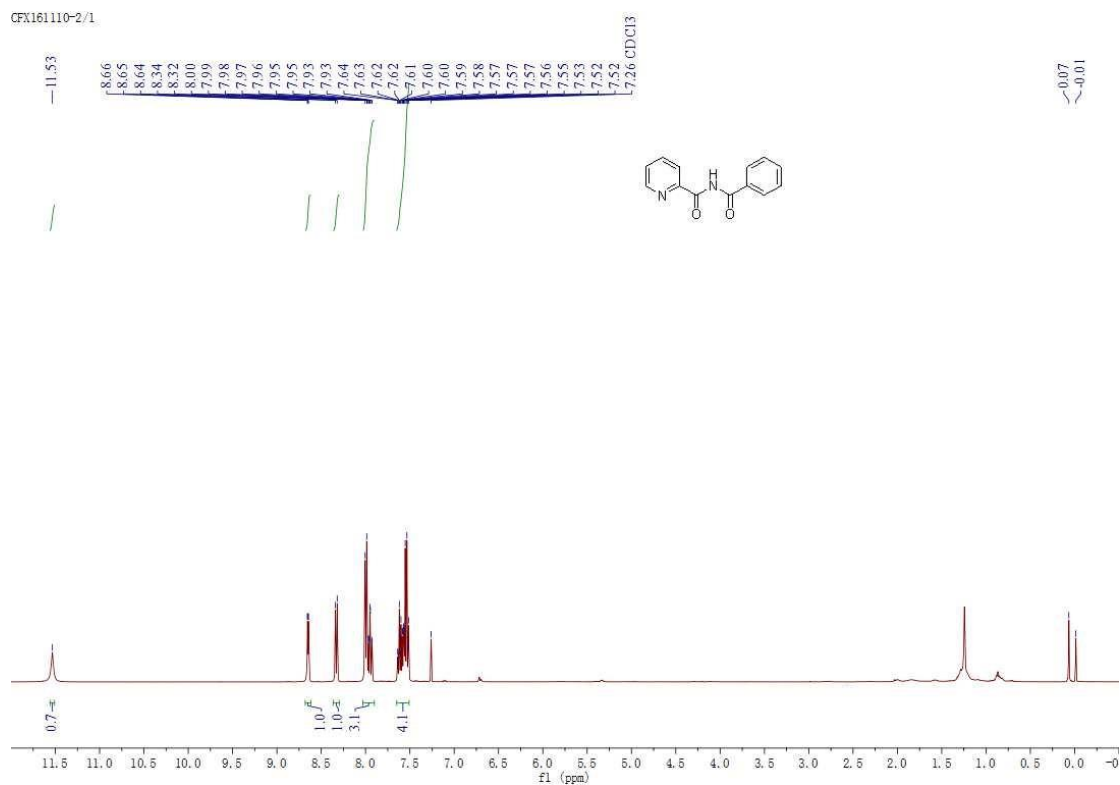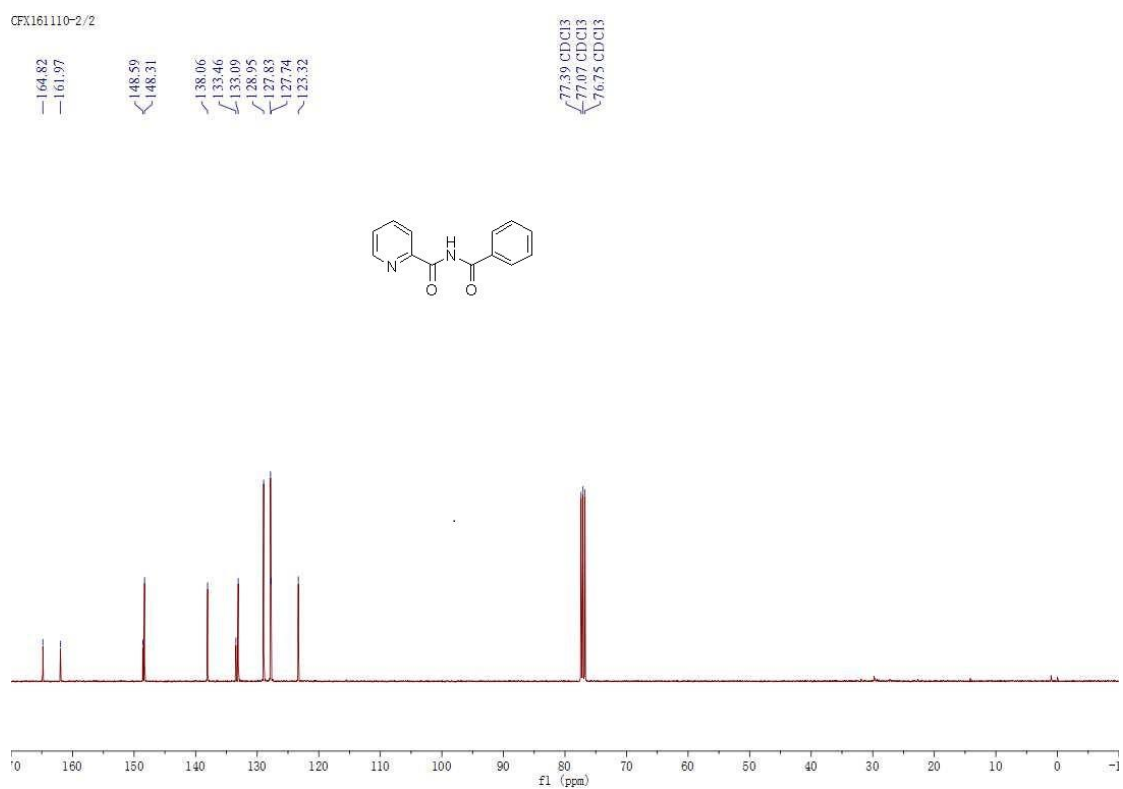

2b

fec170728-1.10.fid

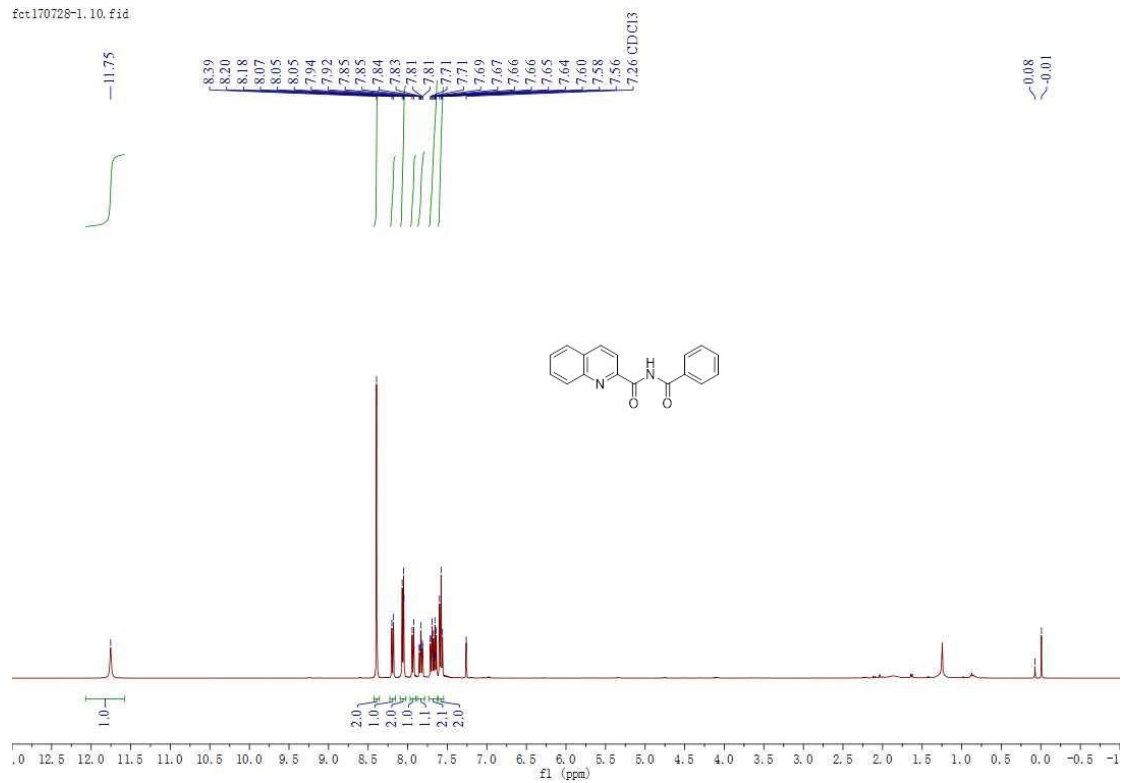

fec170728-1.11.fid

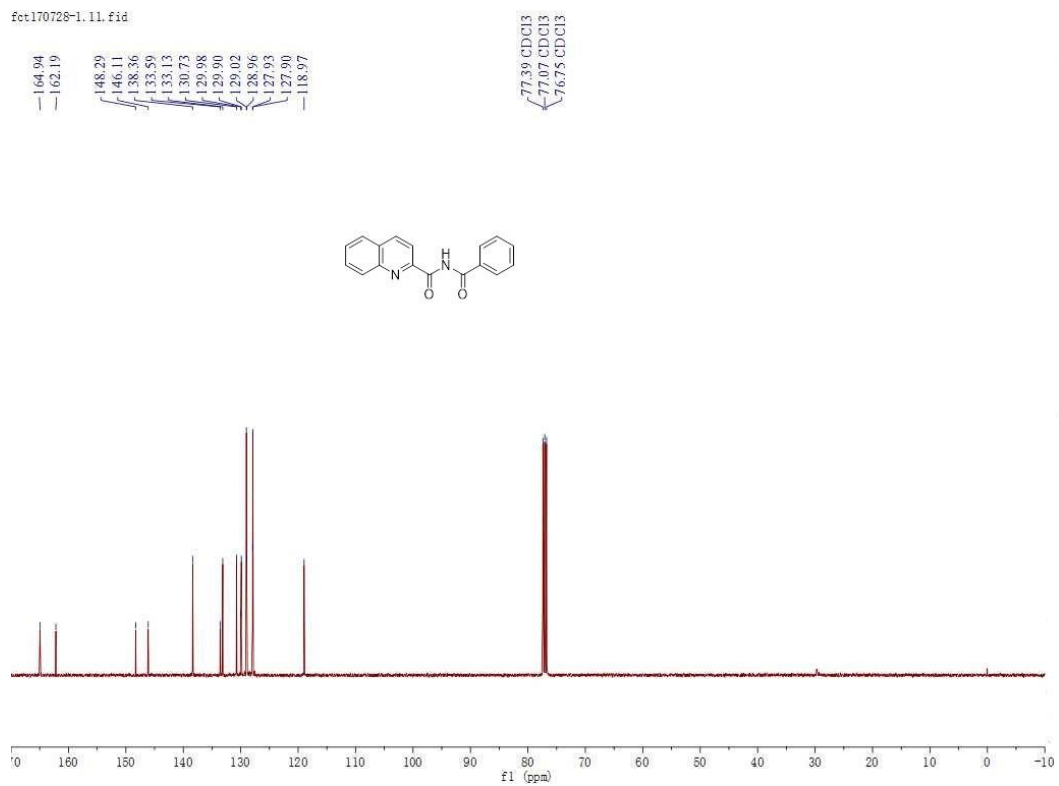

2c

CFX170618-1/1

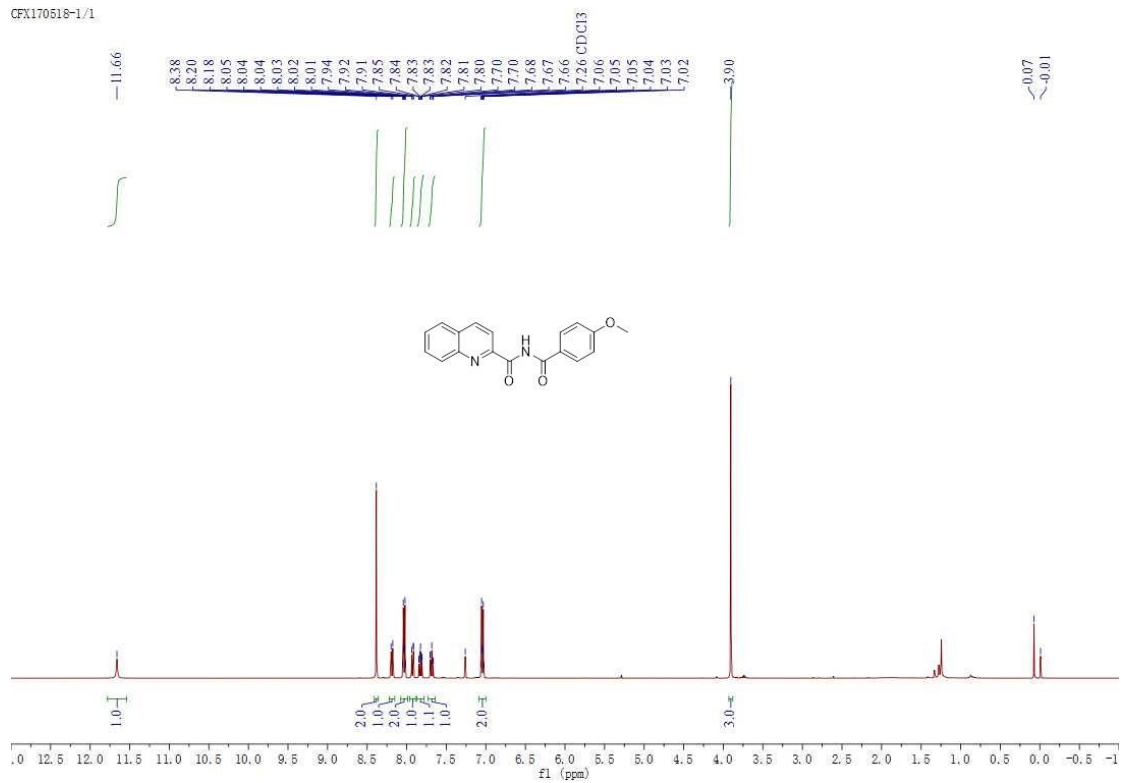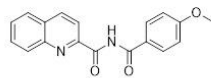

CFX170618-1/2

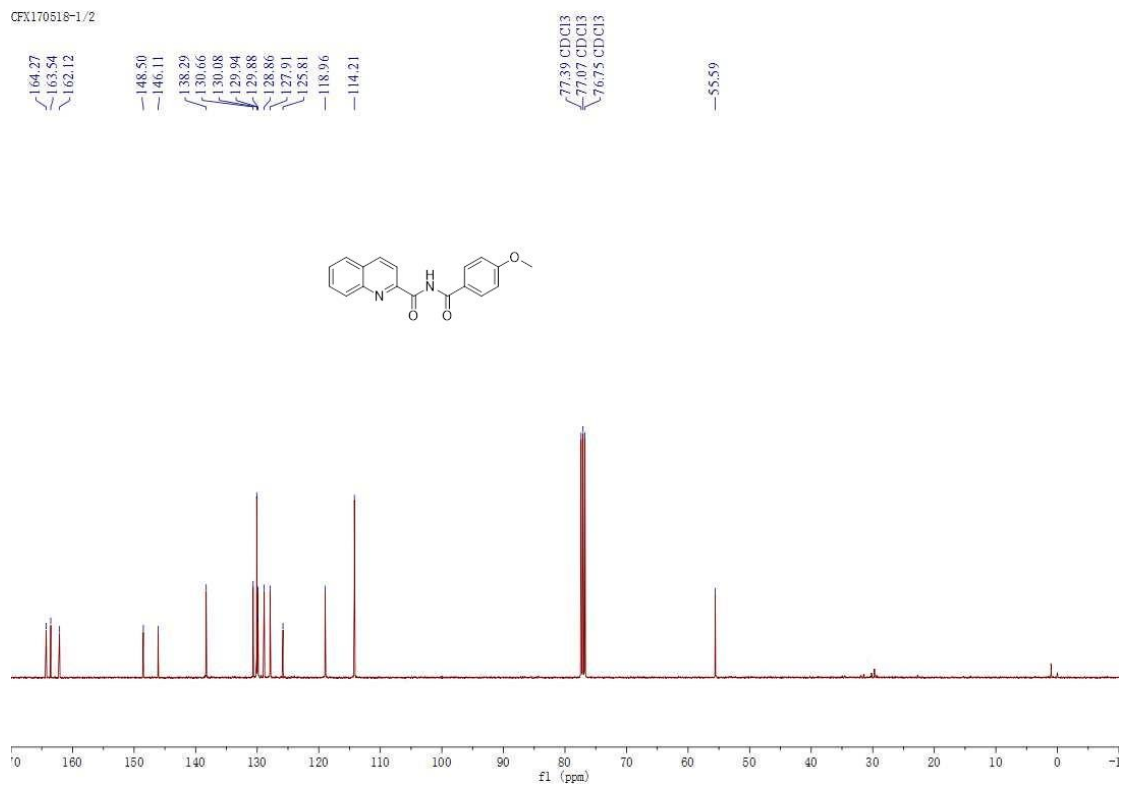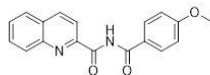

# 2d

FCT170702-1/1

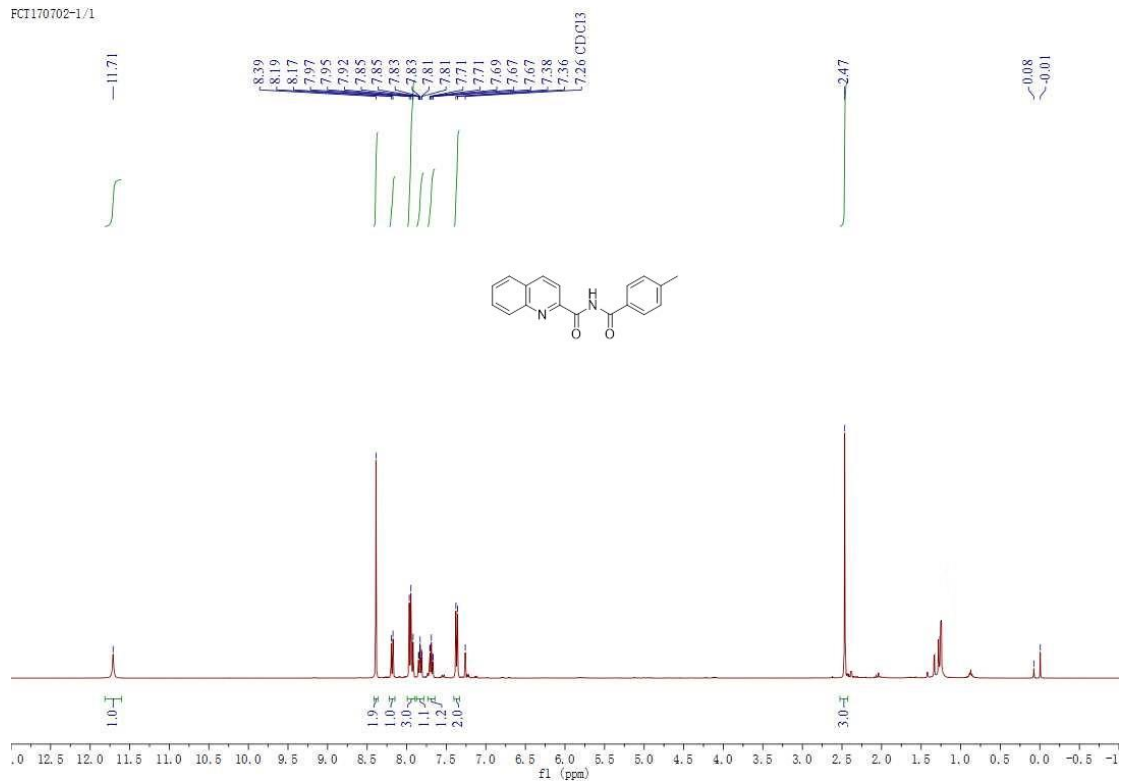

FCT170702-1/2

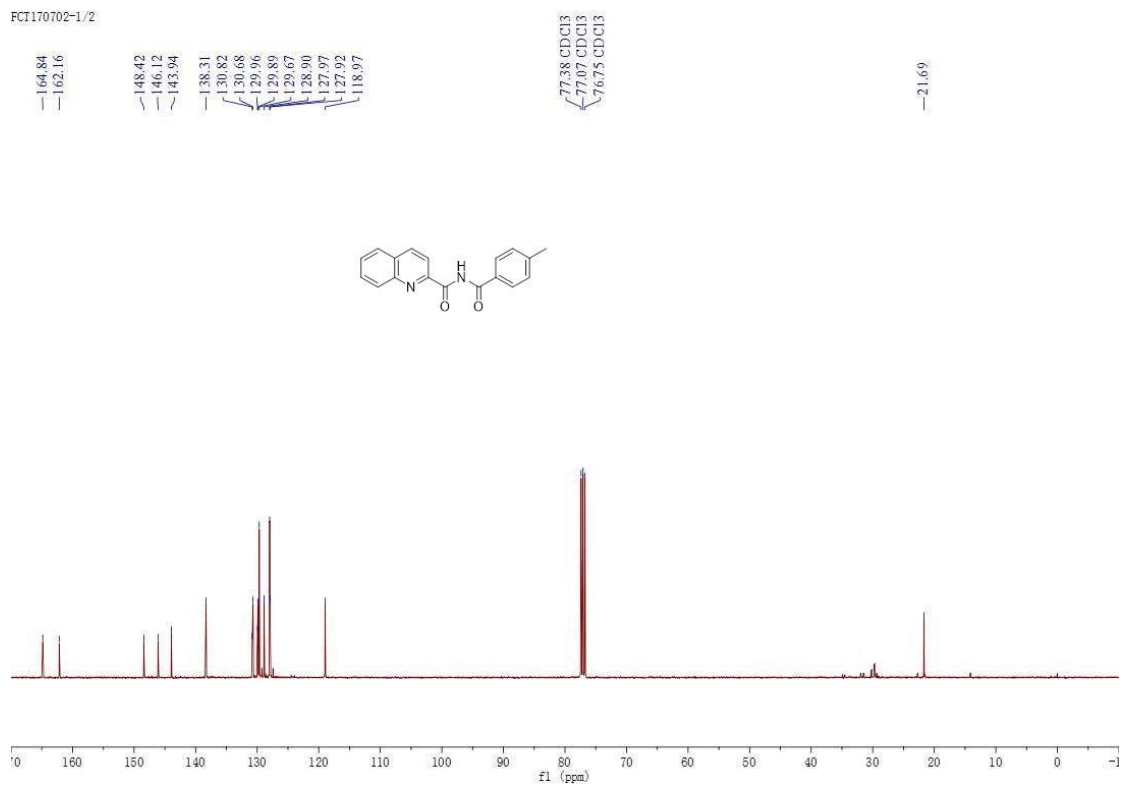



2e

CFX170516-1/1

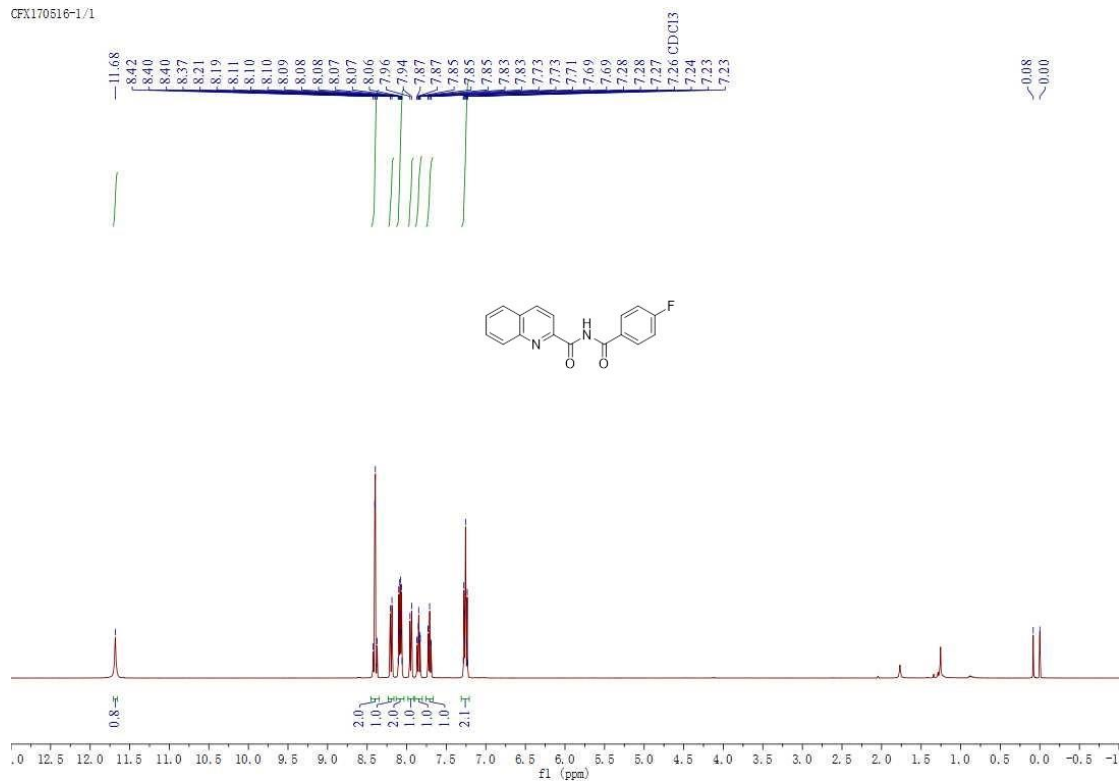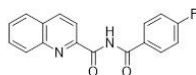

CFX170516-1/2

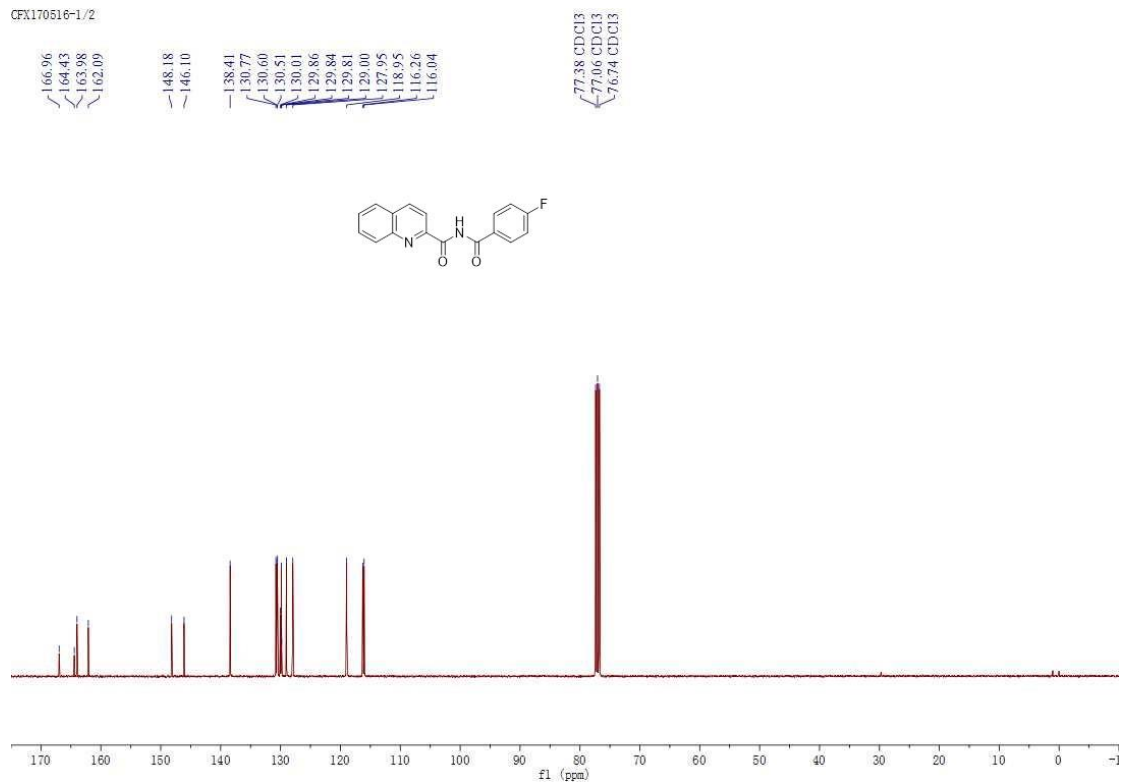

2f

WHJ170710-2/1

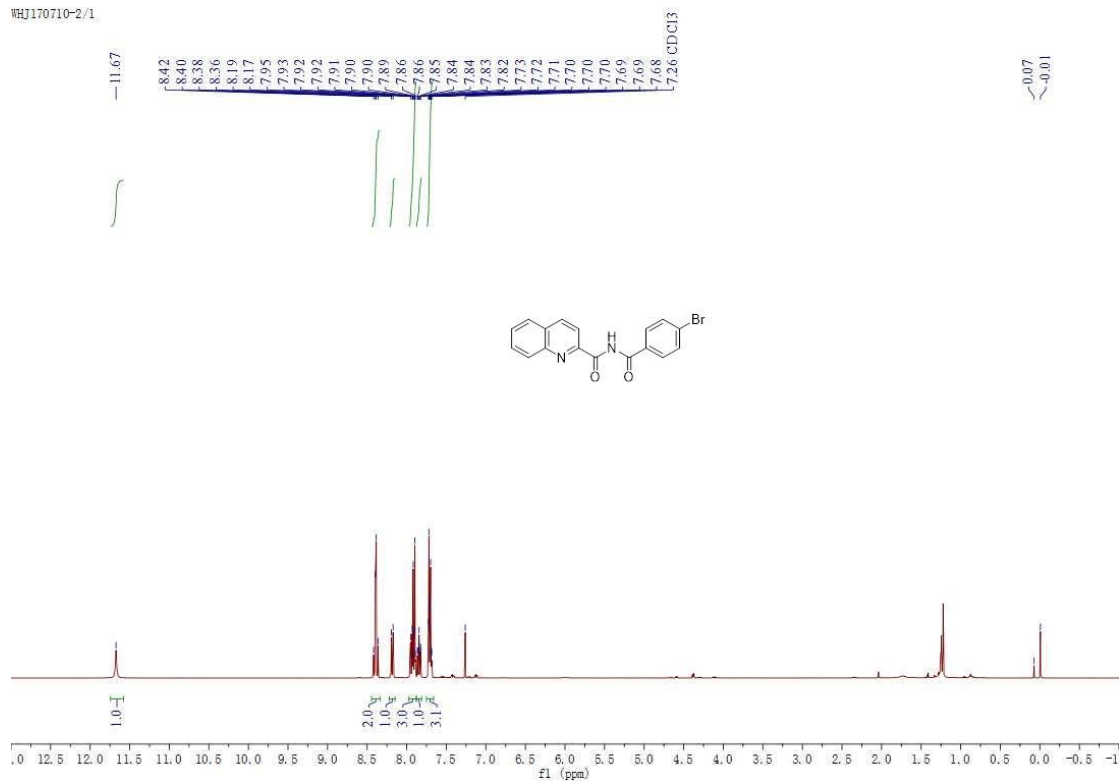

WHJ170710-2/2

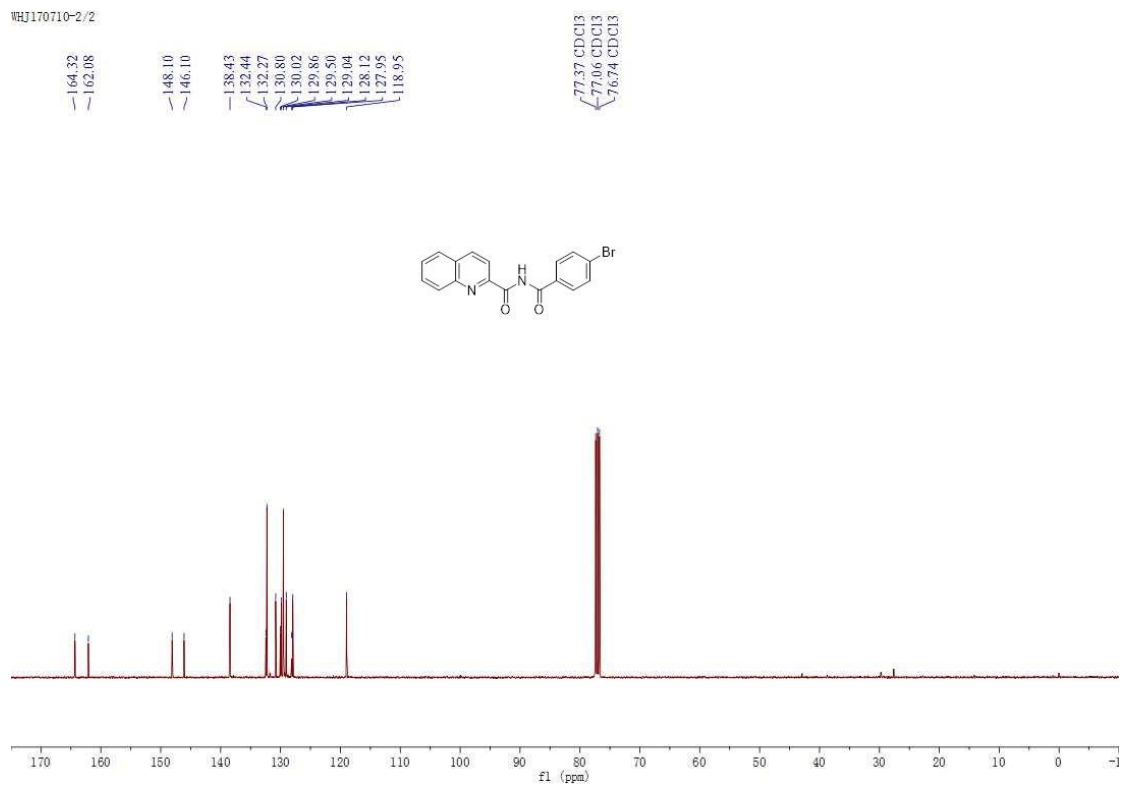

2g

CFX170616-2/1

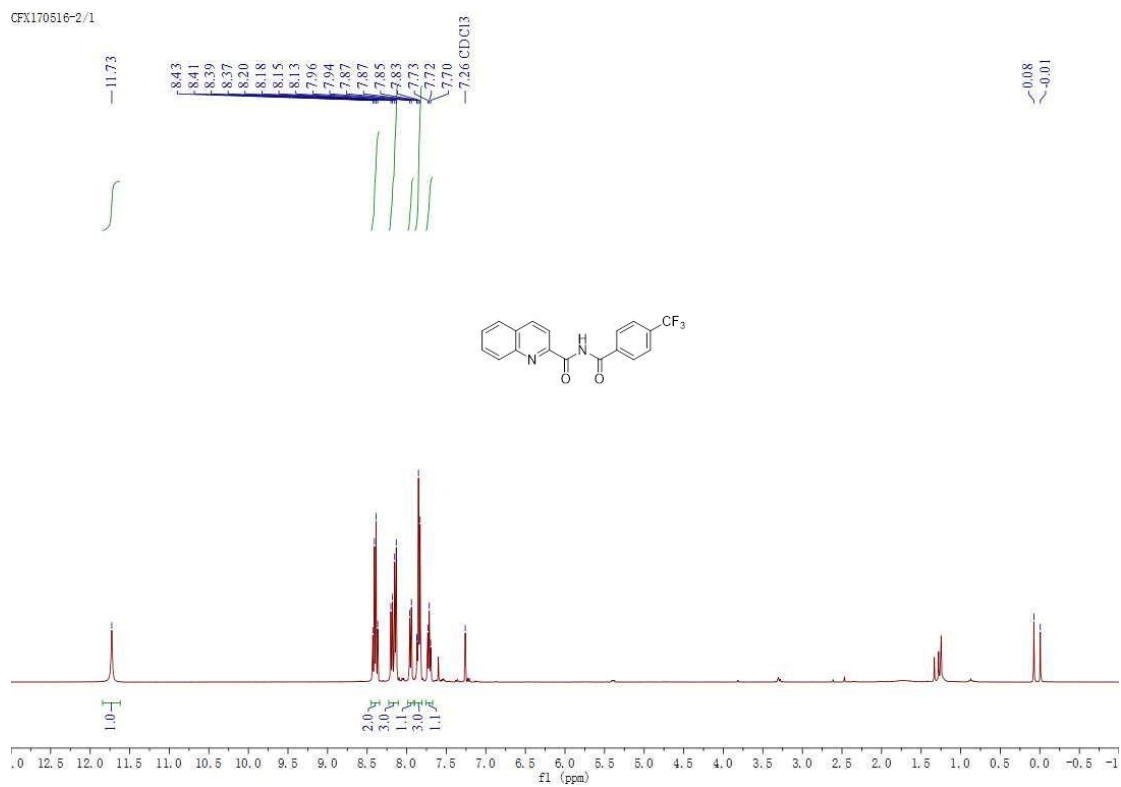

CFX170616-2/2

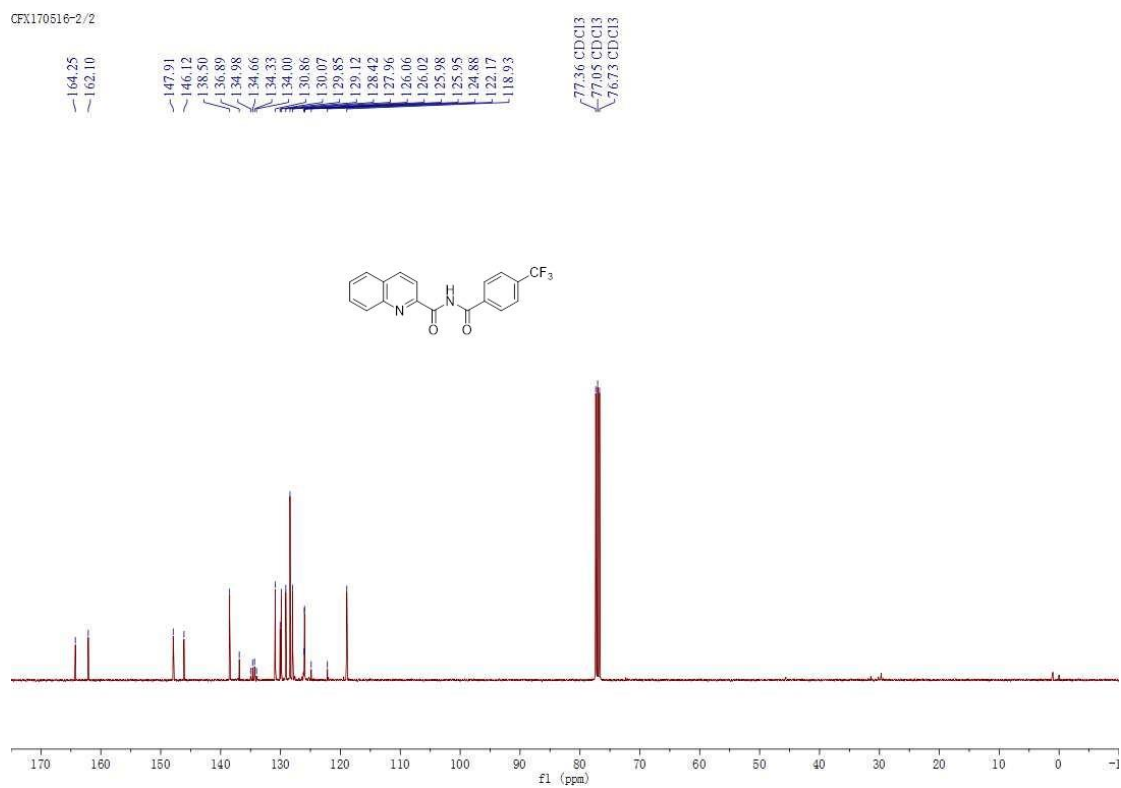

2h

CFX170526-2/1

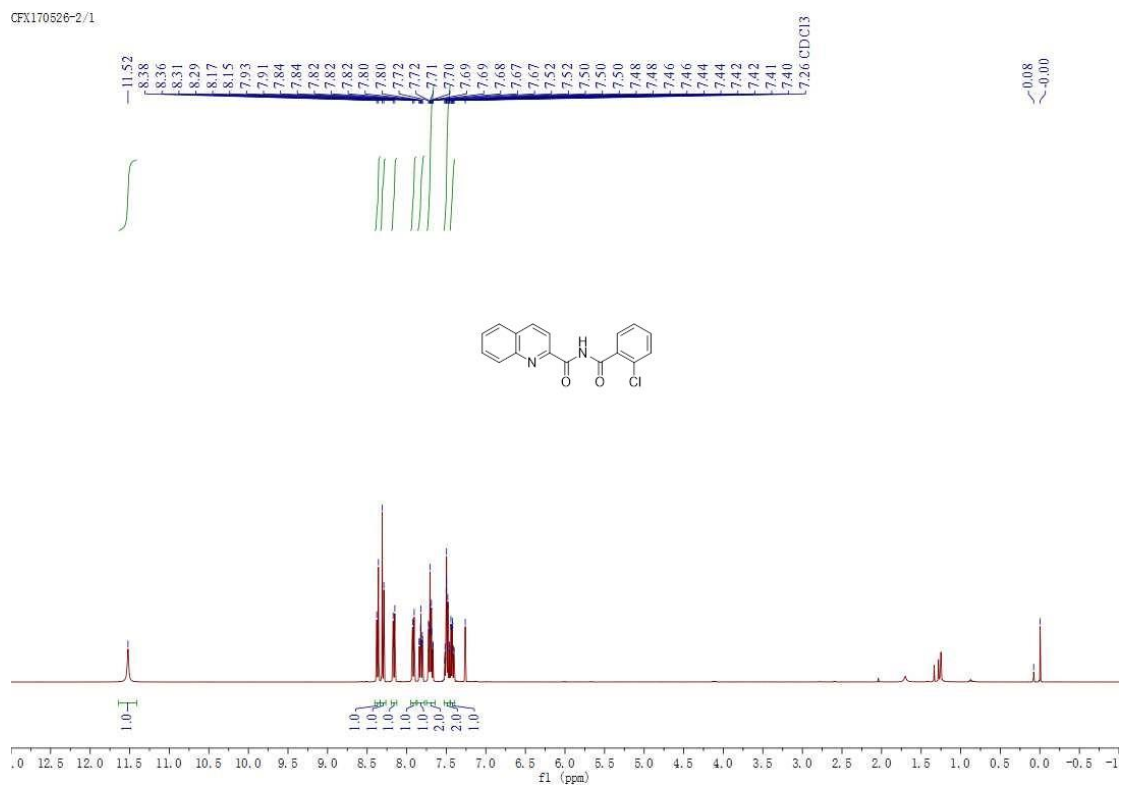

CFX170526-2/2

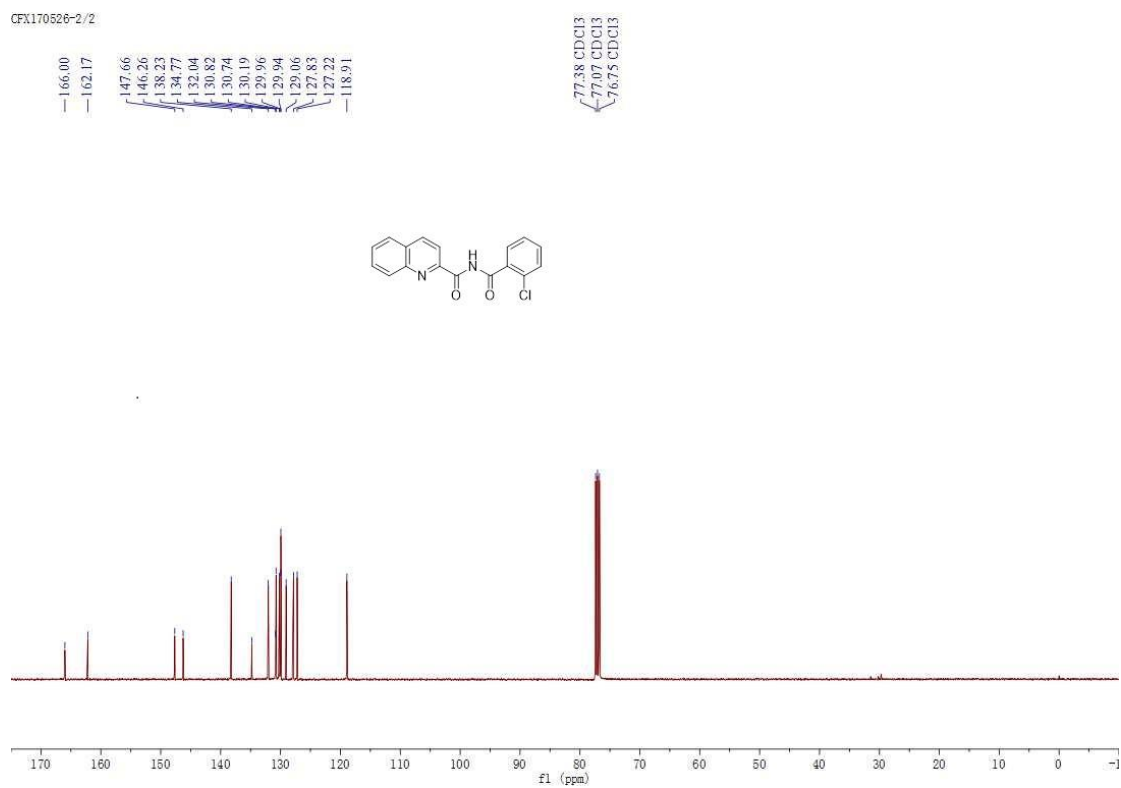

2i

WHJ170712-1/1

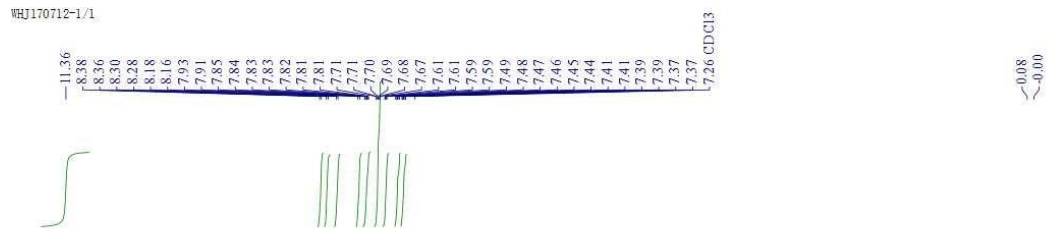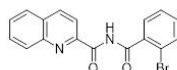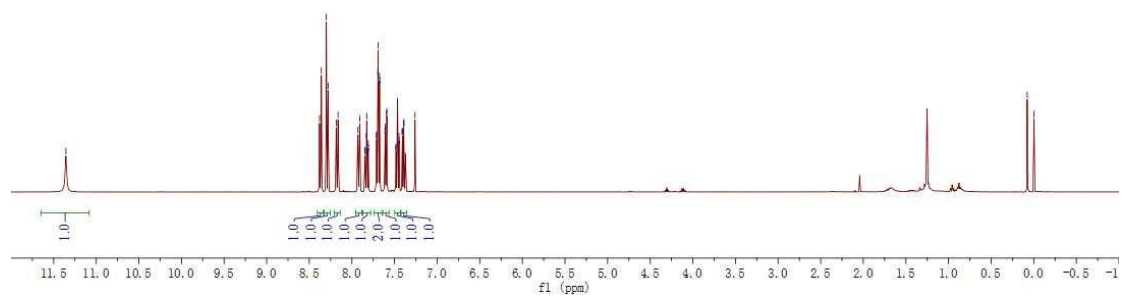

WHJ170712-1/2

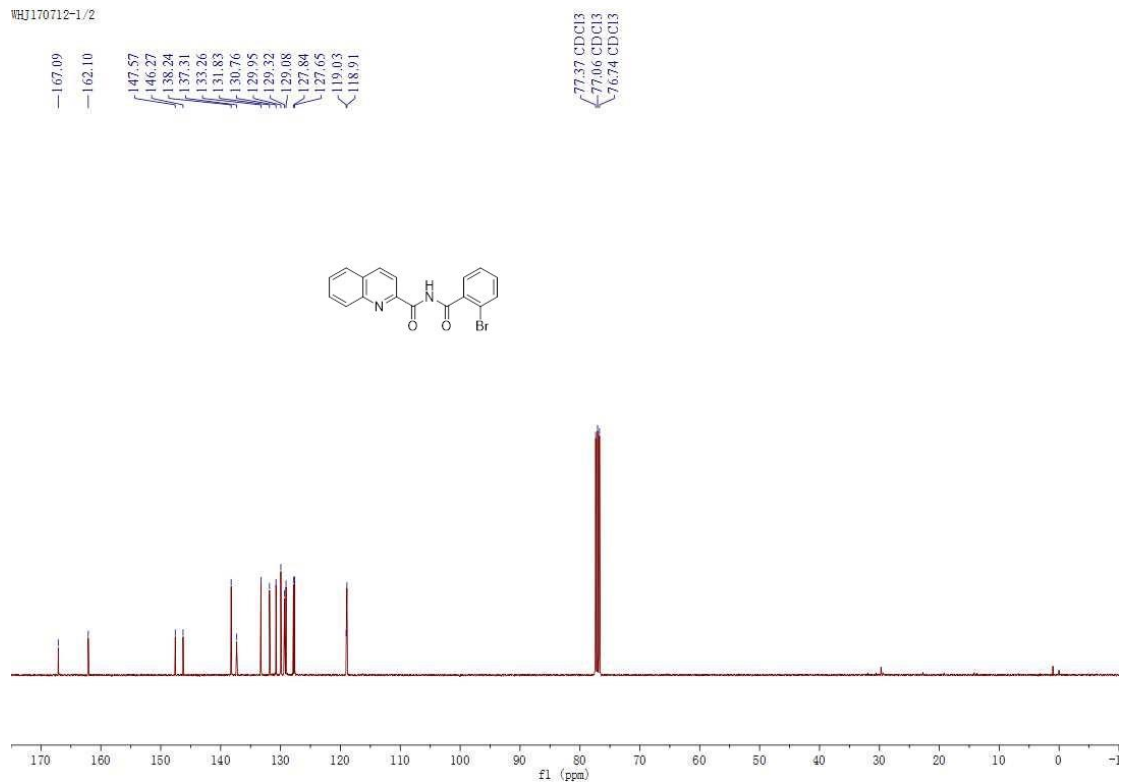

2j

CFX170104-1/1

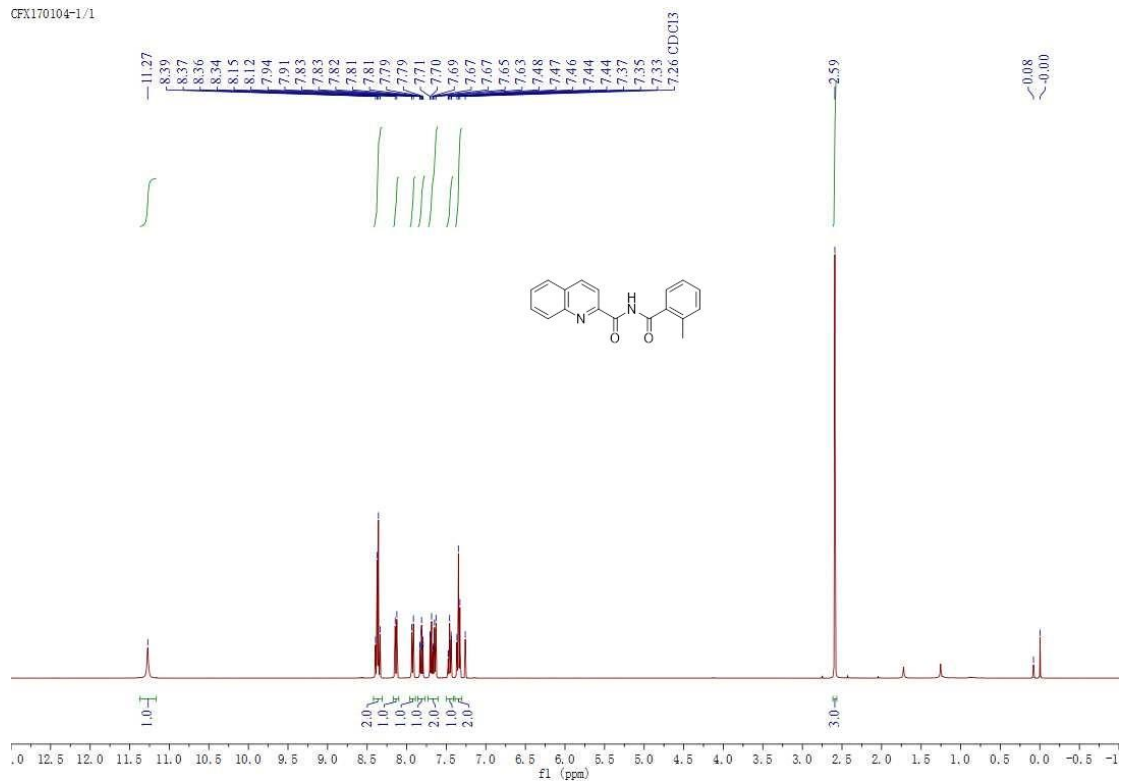

CFX170104-1/2

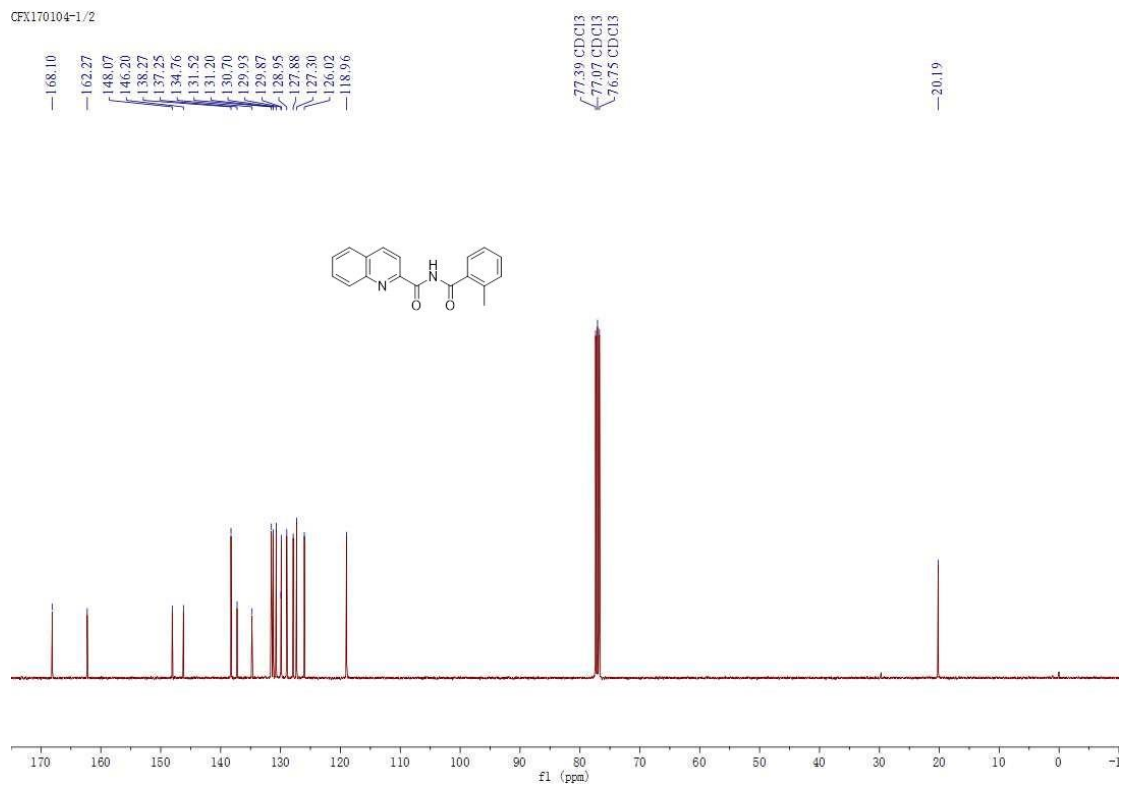

2k

whj170715-1.10.fid

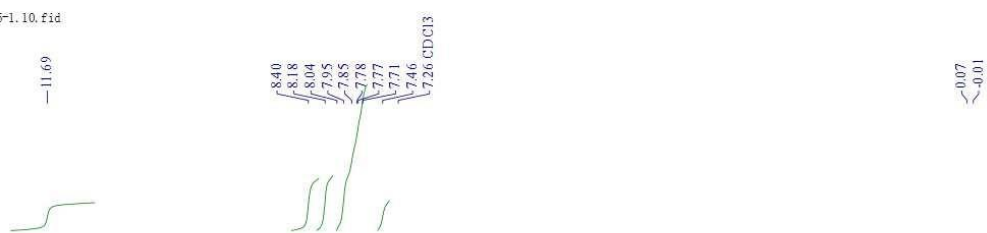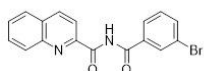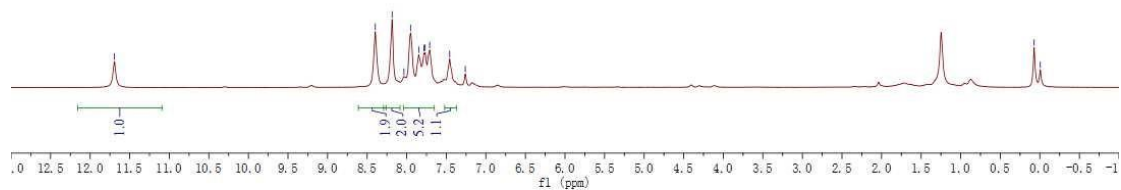

whj170715-1.10.fid

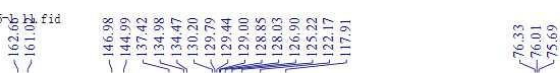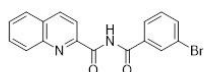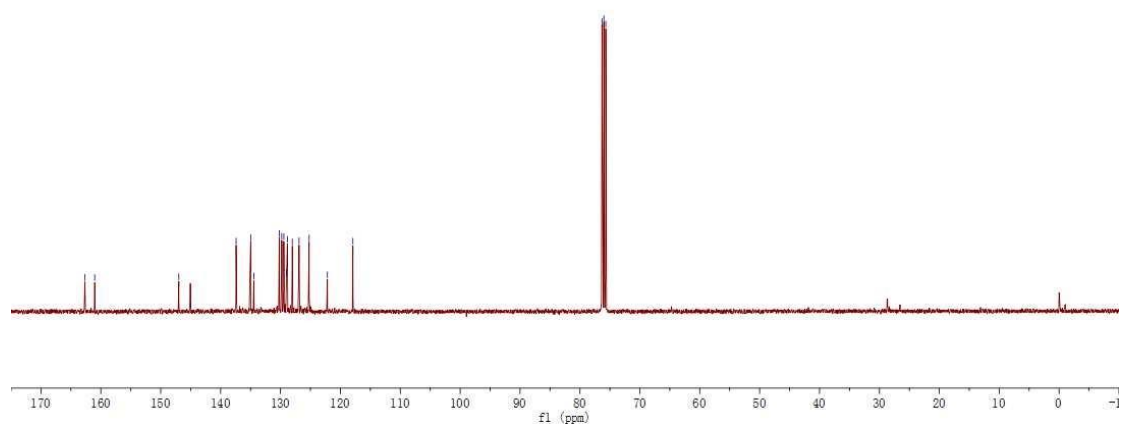

21

CFX161223-1/1

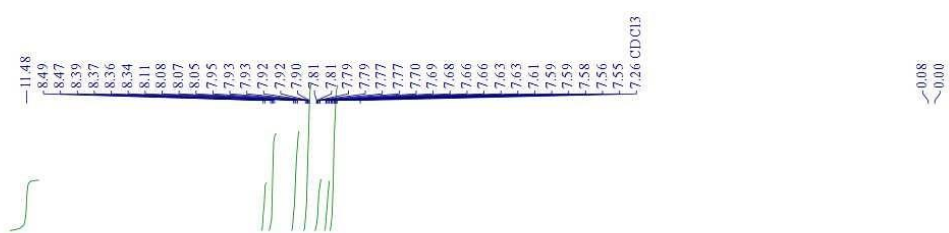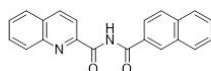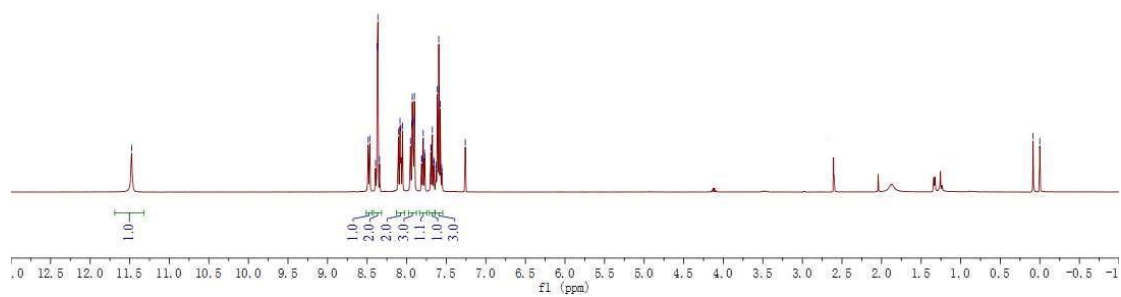

CFX161223-1/2

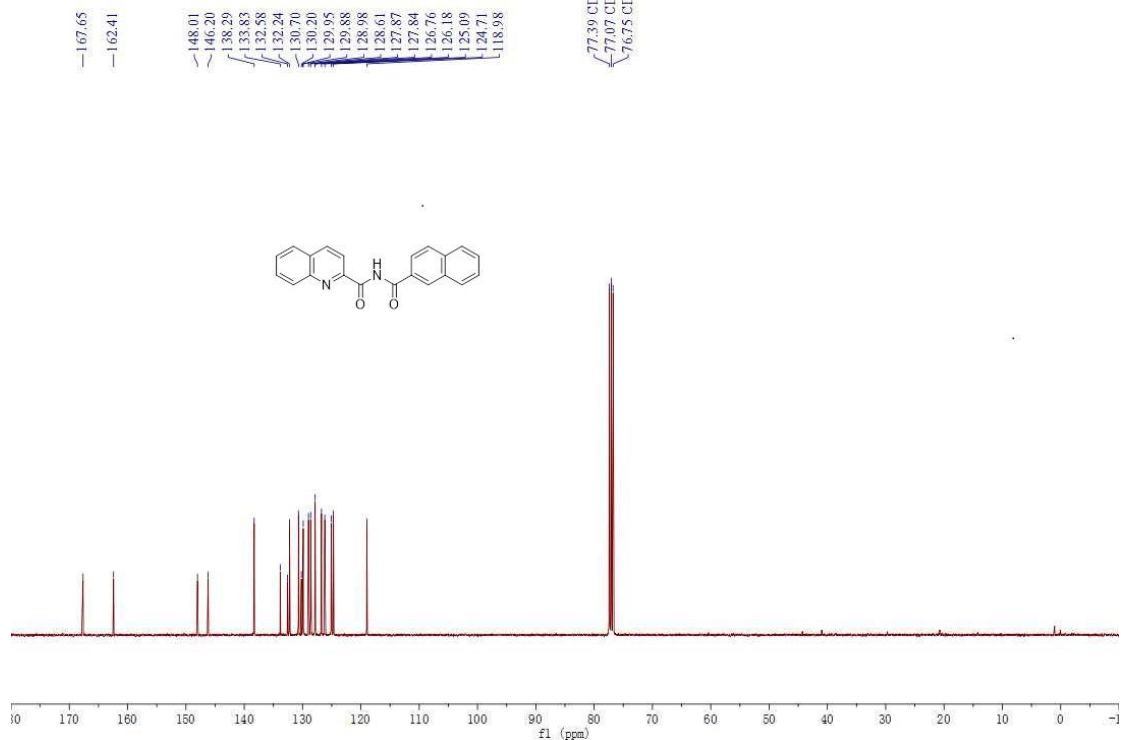



2m

CFX170106-1/1

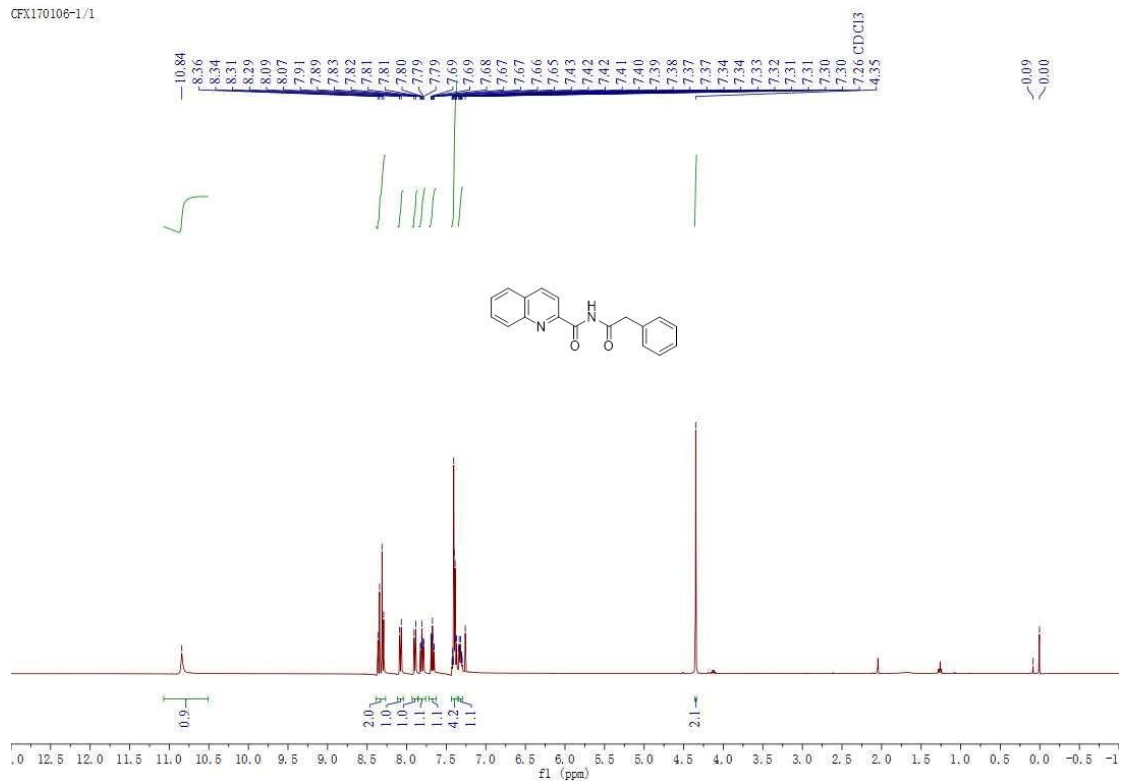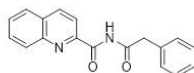

CFX170106-1/2

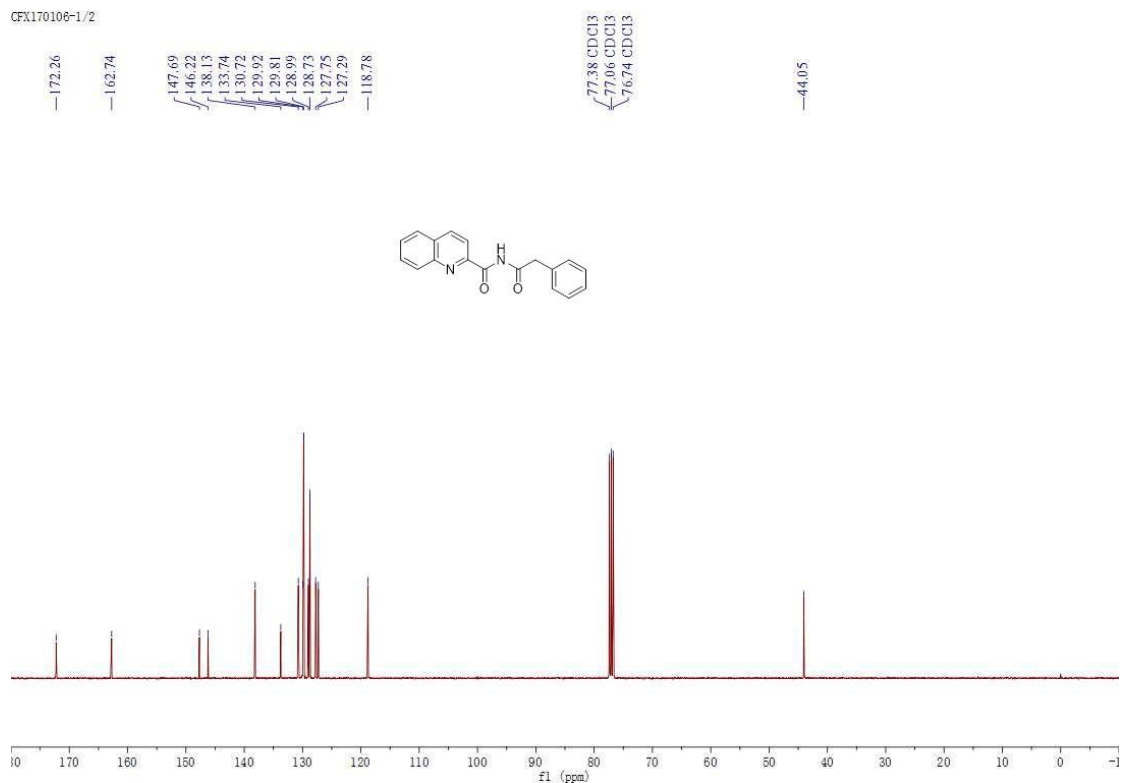

# 2n

CFX170112-2/1

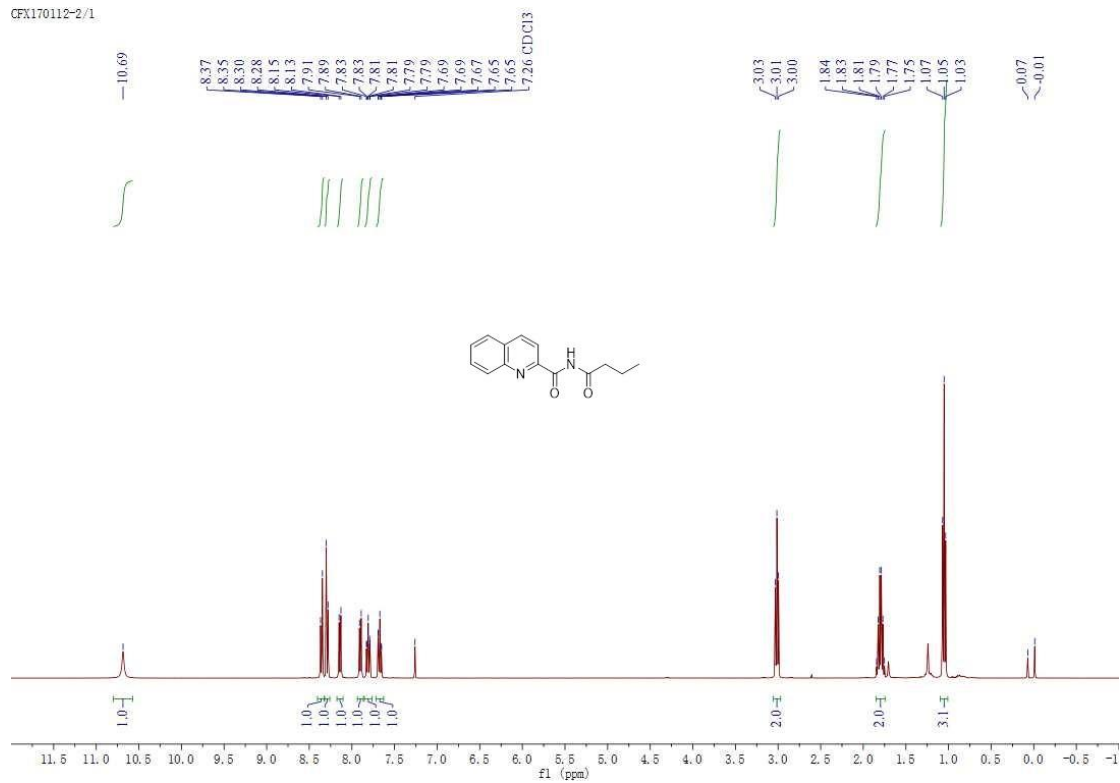

CFX170112-2/2

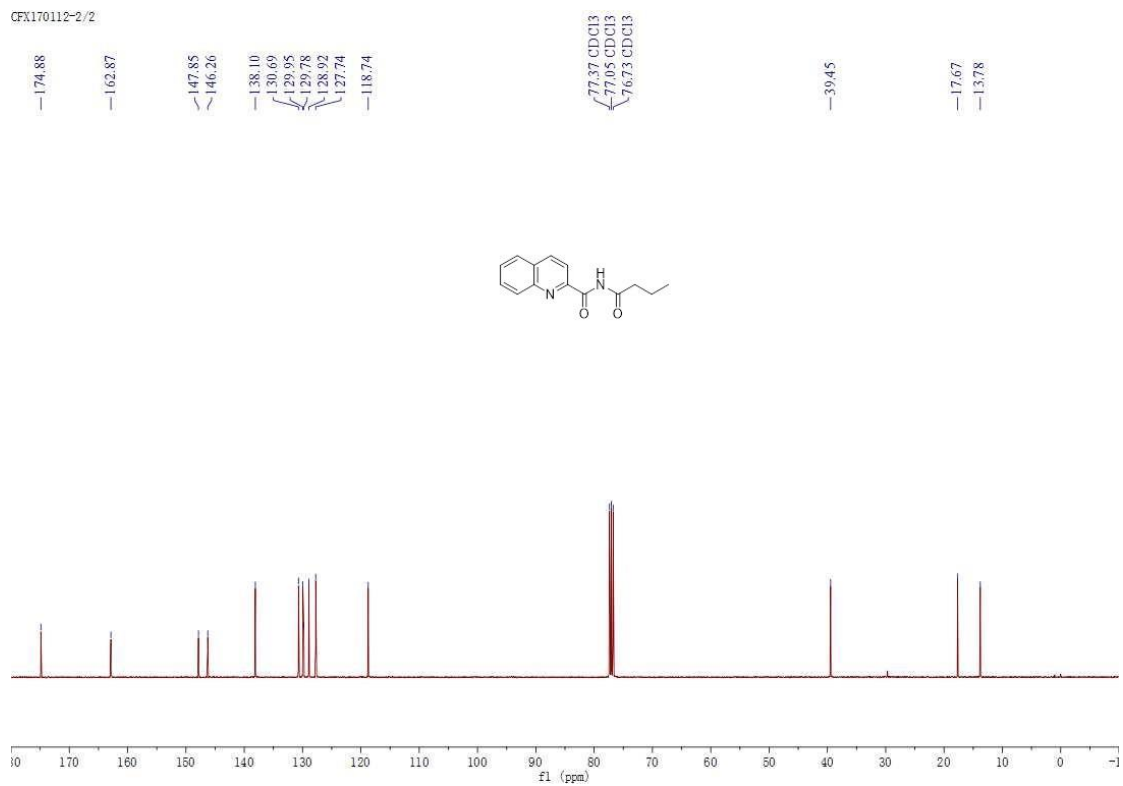

2o

CFX170106-2/1

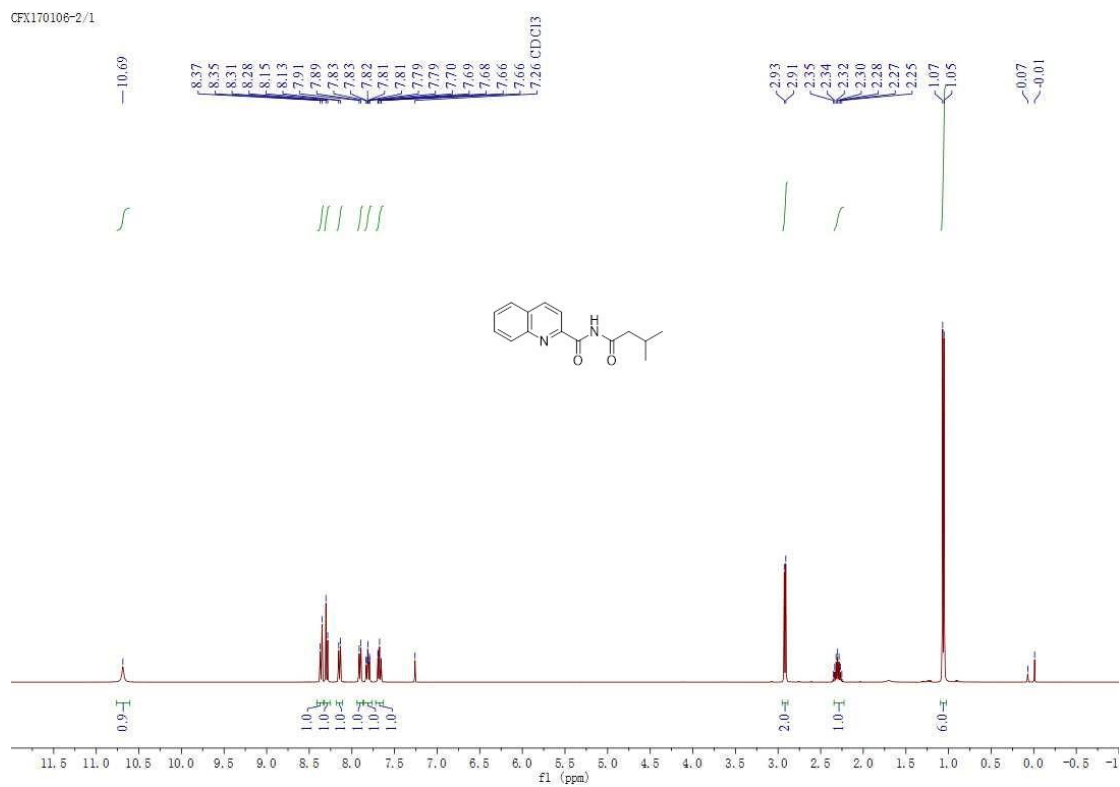

CFX170106-2/2

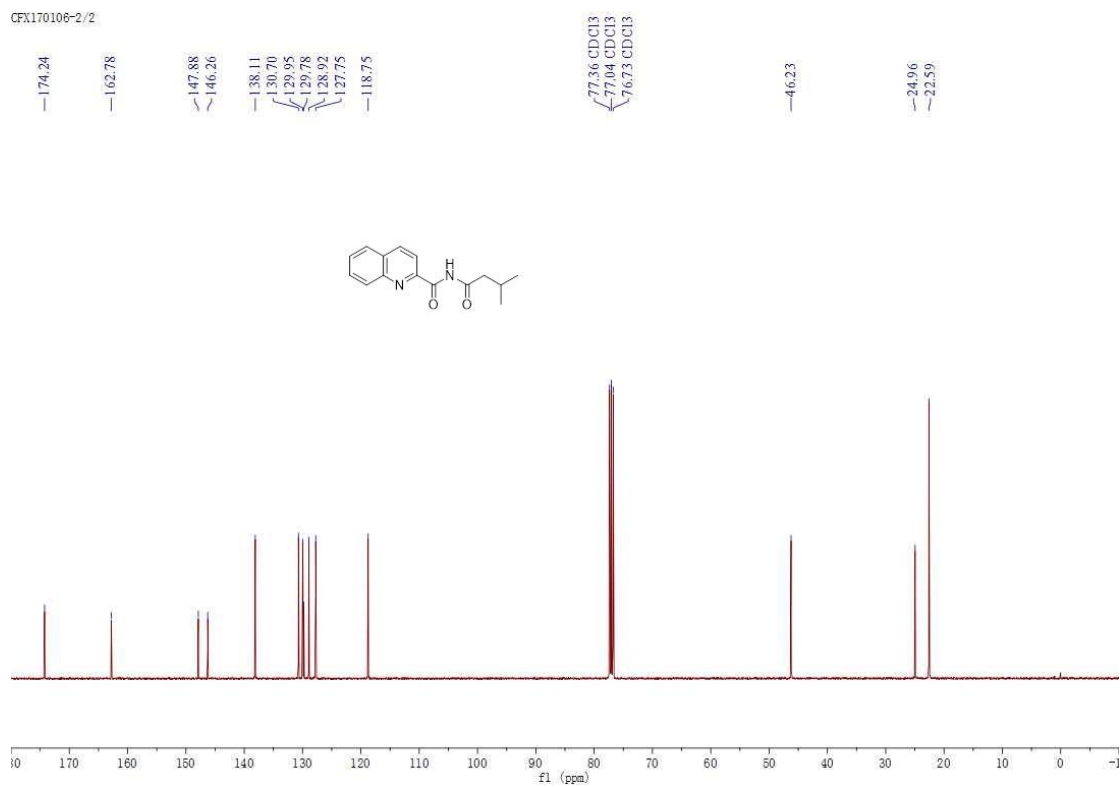

2p

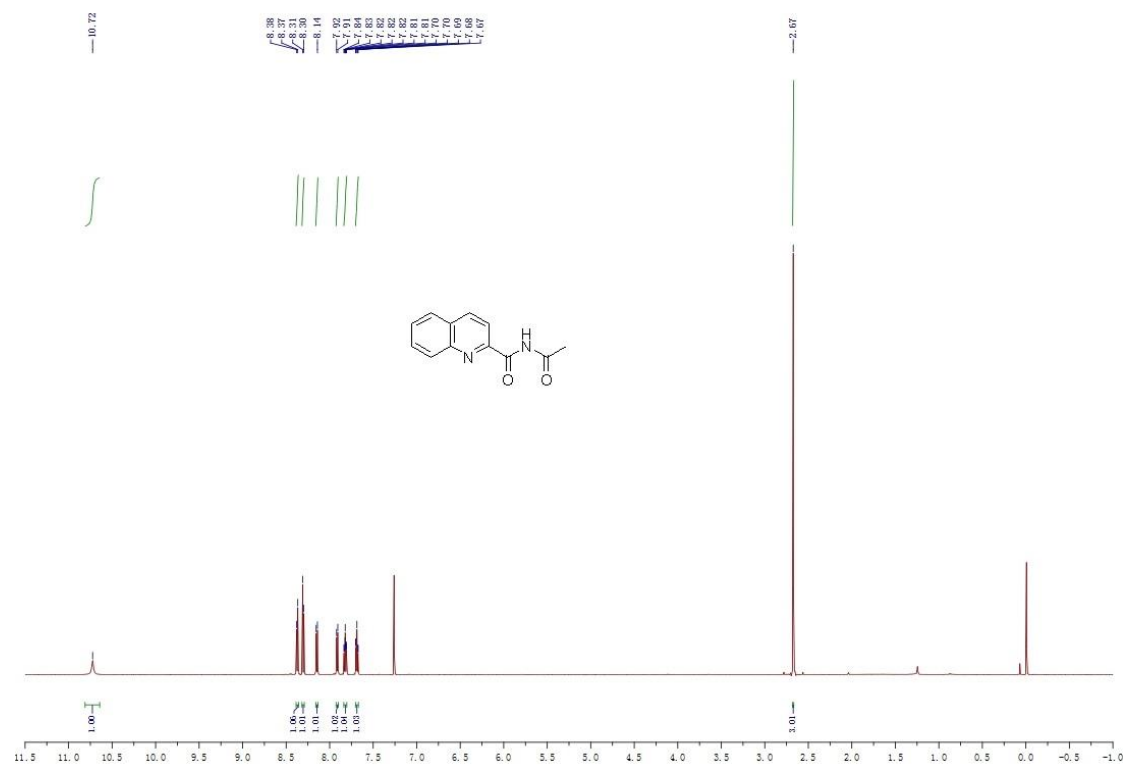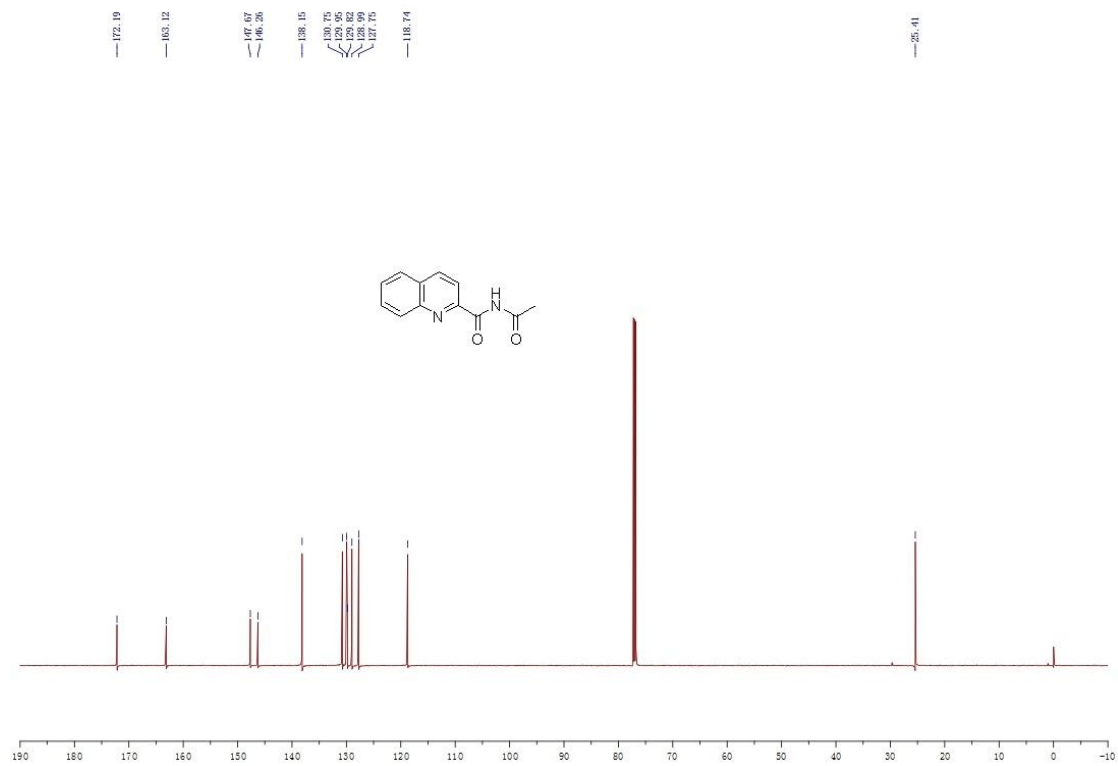

2q

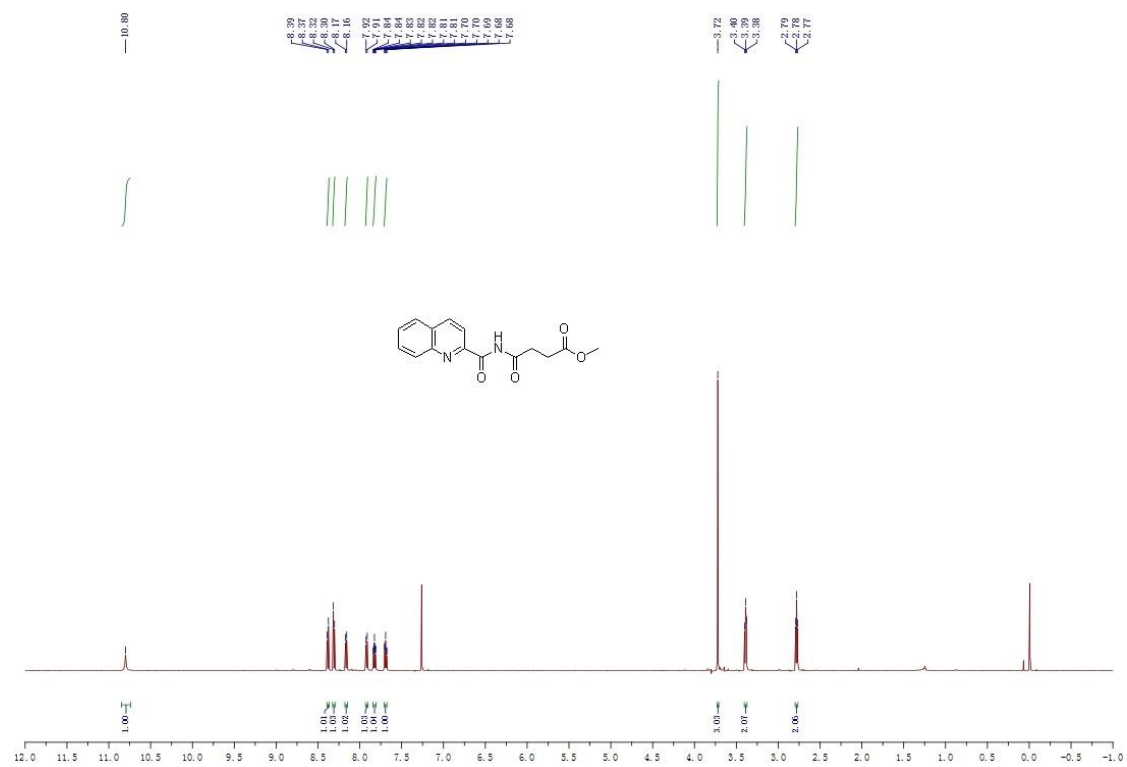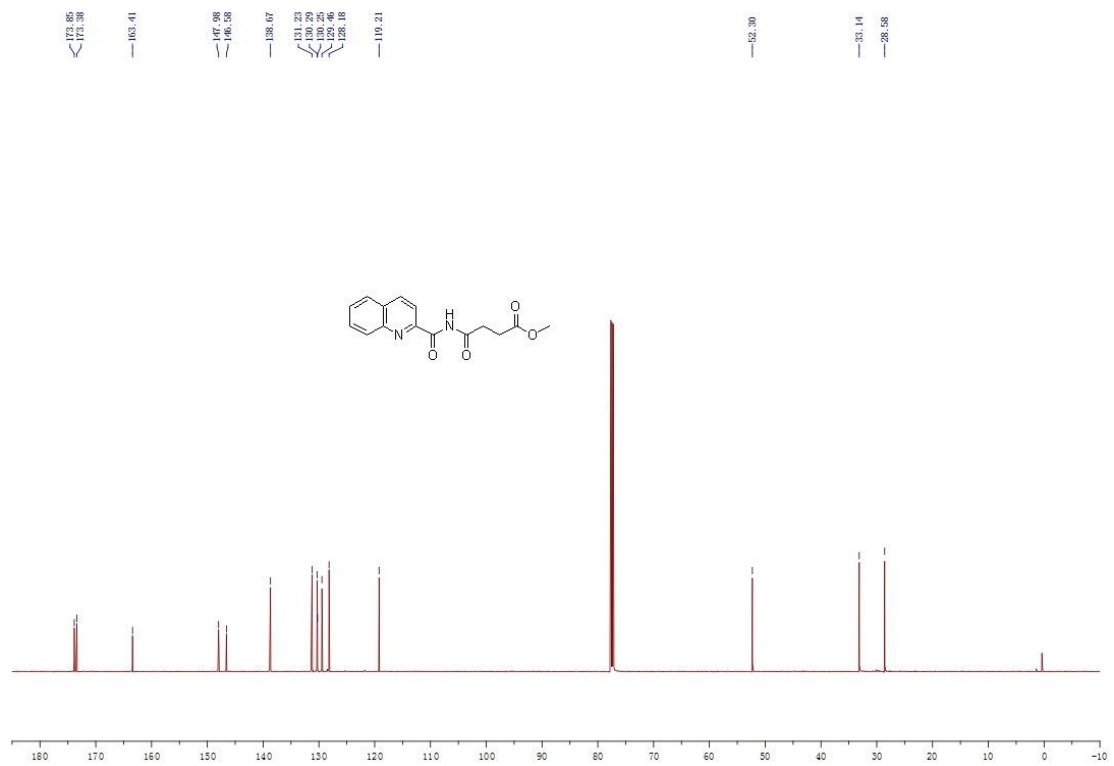

2r

CFX170116-1/1

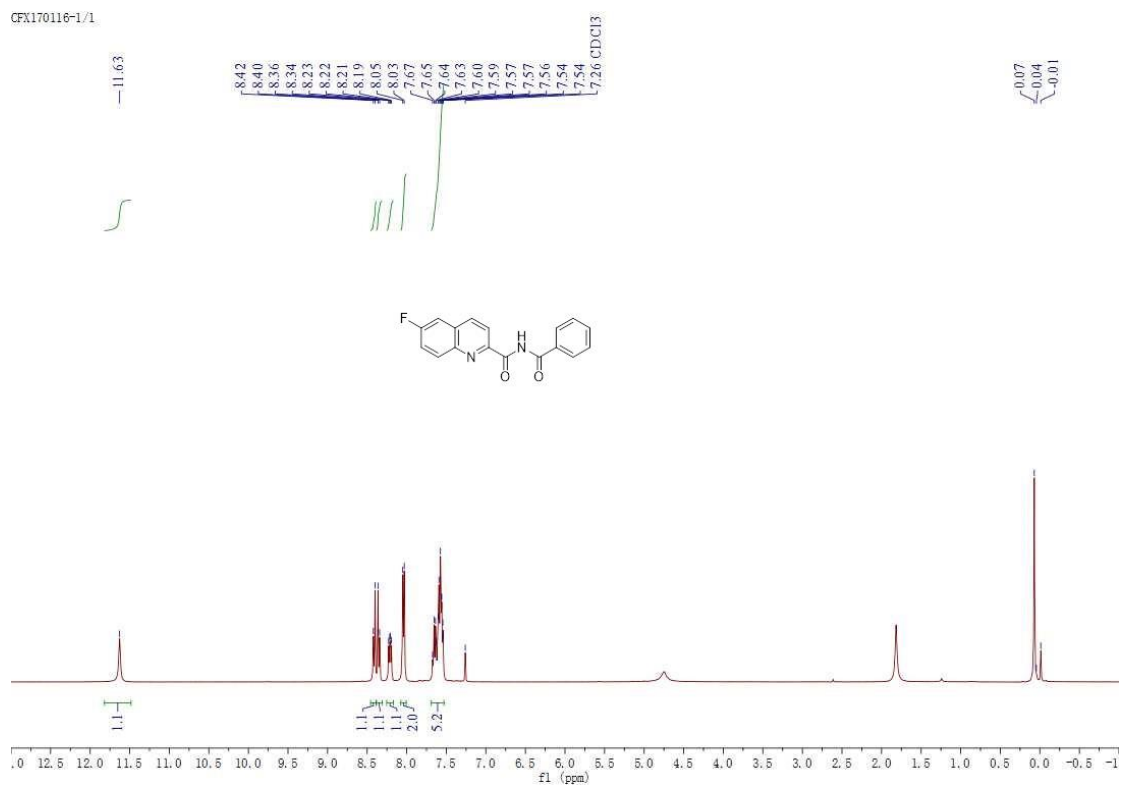

CFX170116-1/2

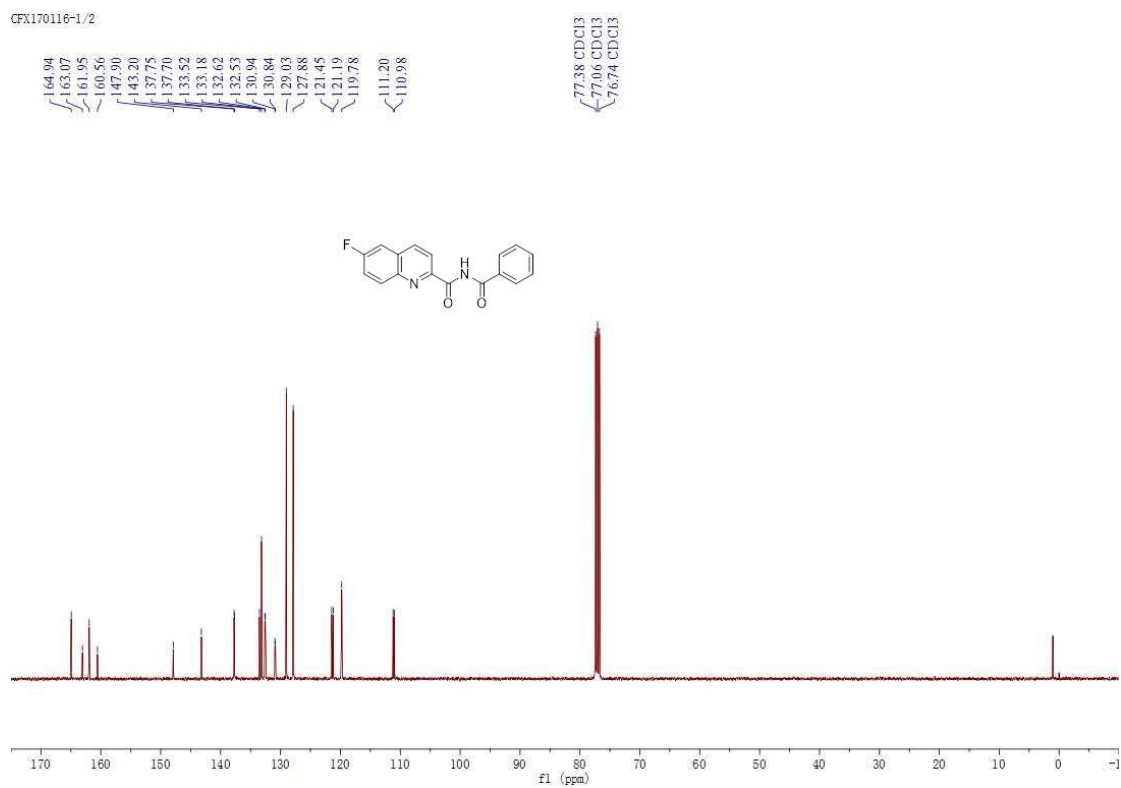

2s

whj170716-1.10.fid

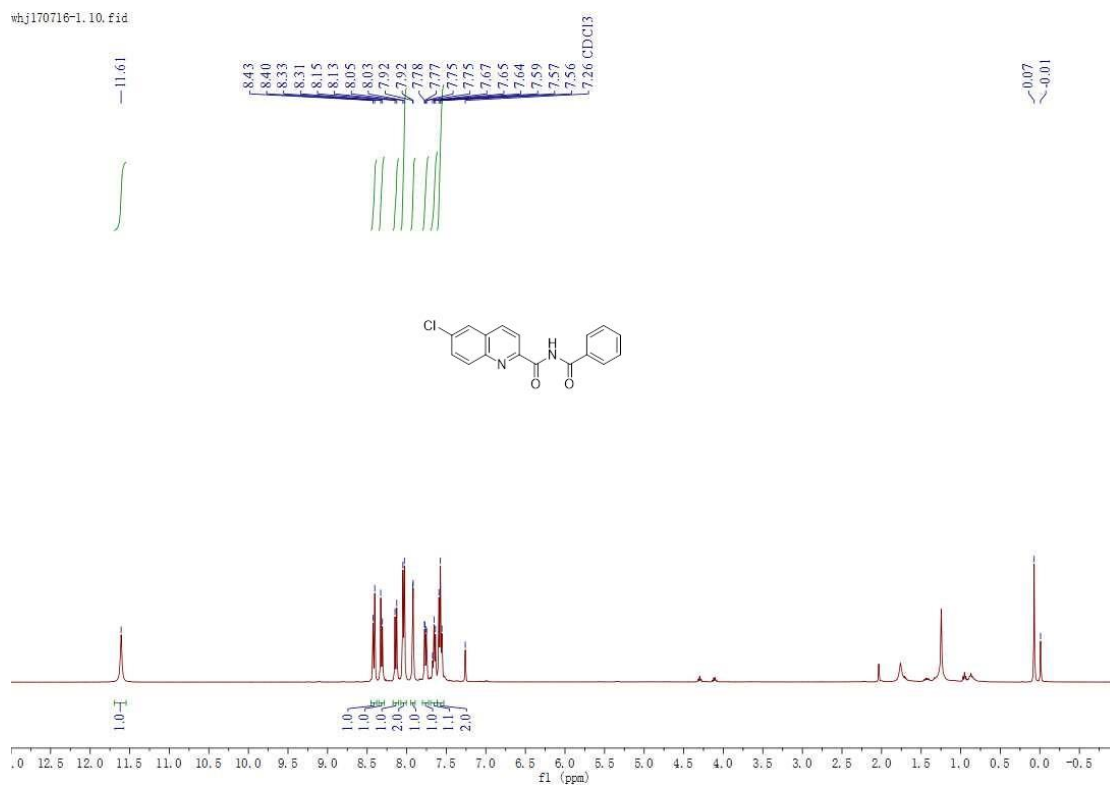

whj170716-1.20.fid

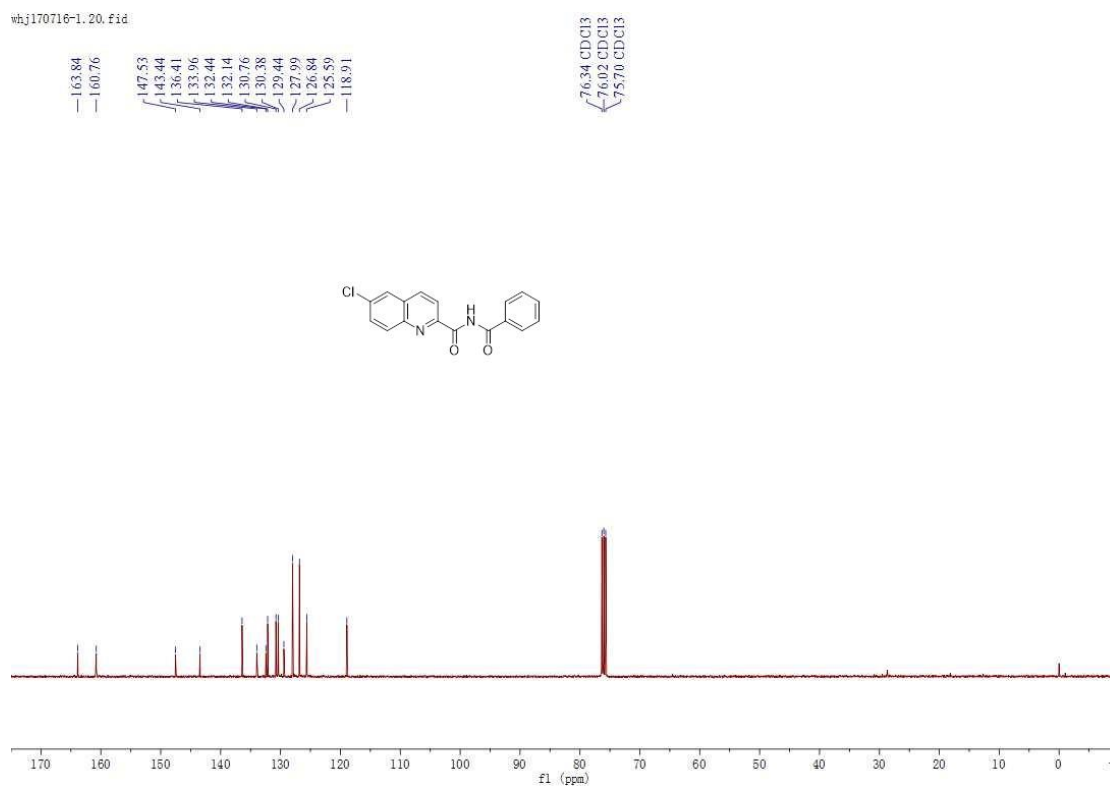

2t

whj170718-1.10.fid

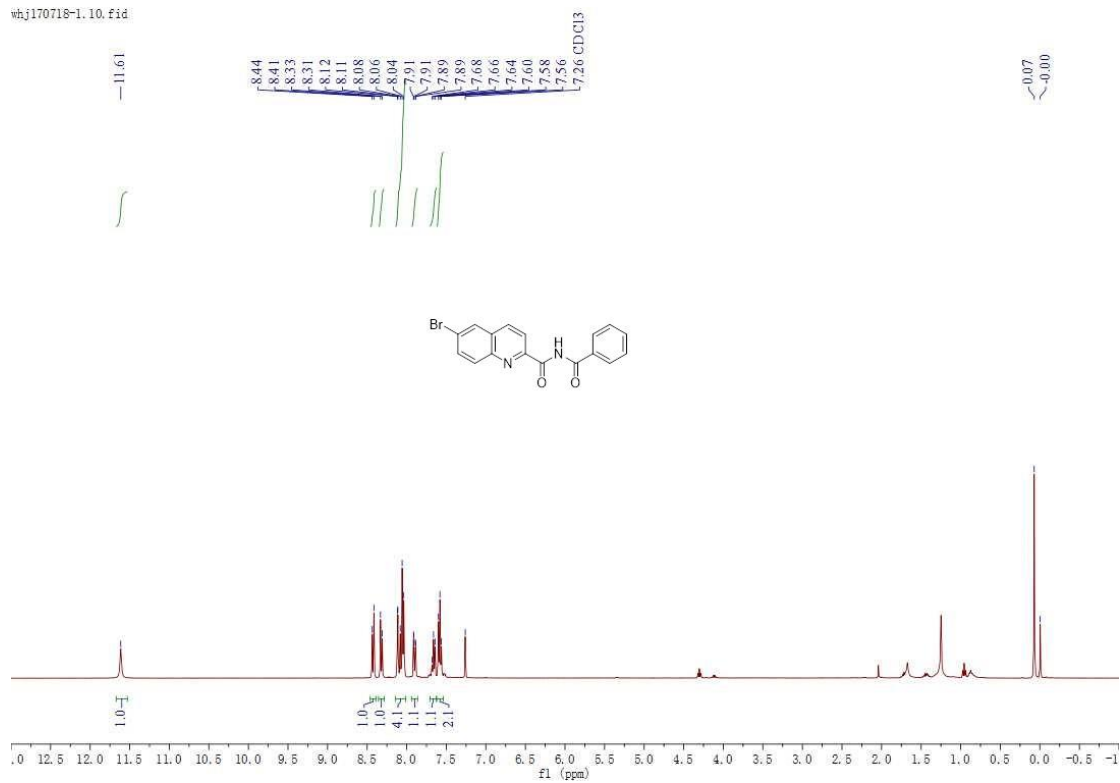

whj170718-1.11.fid

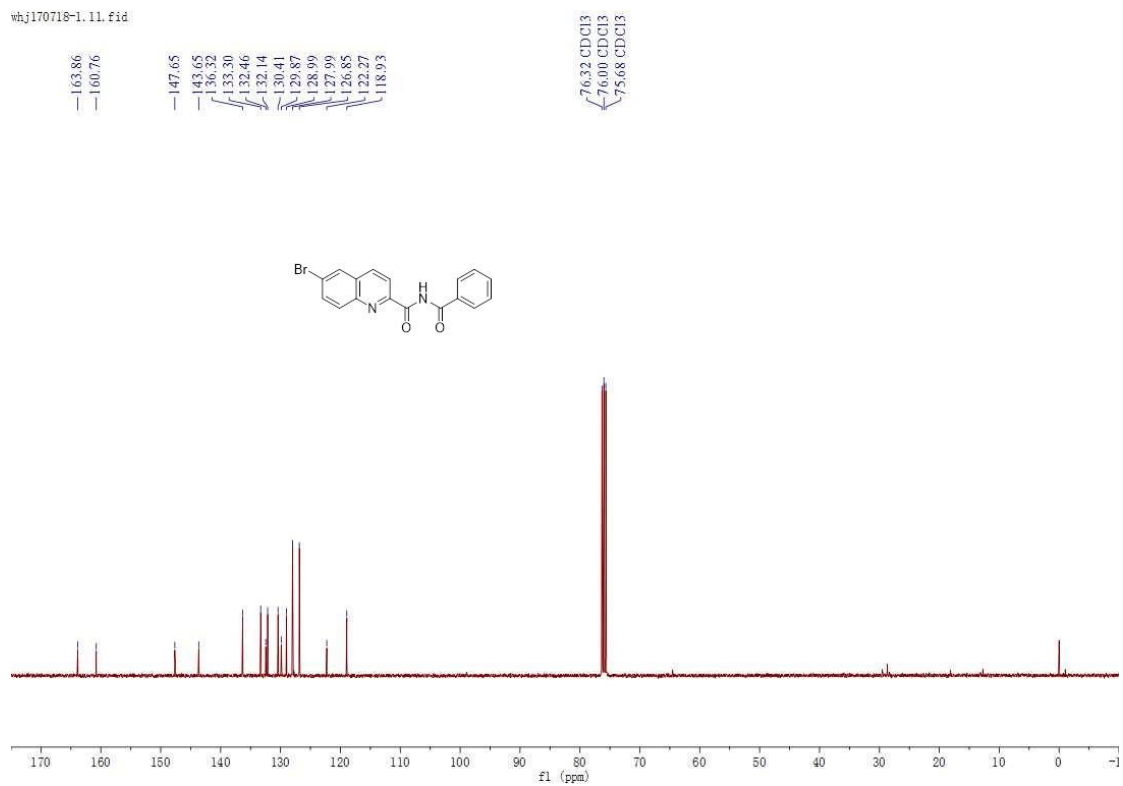



2v

whj170719-1.10.fid

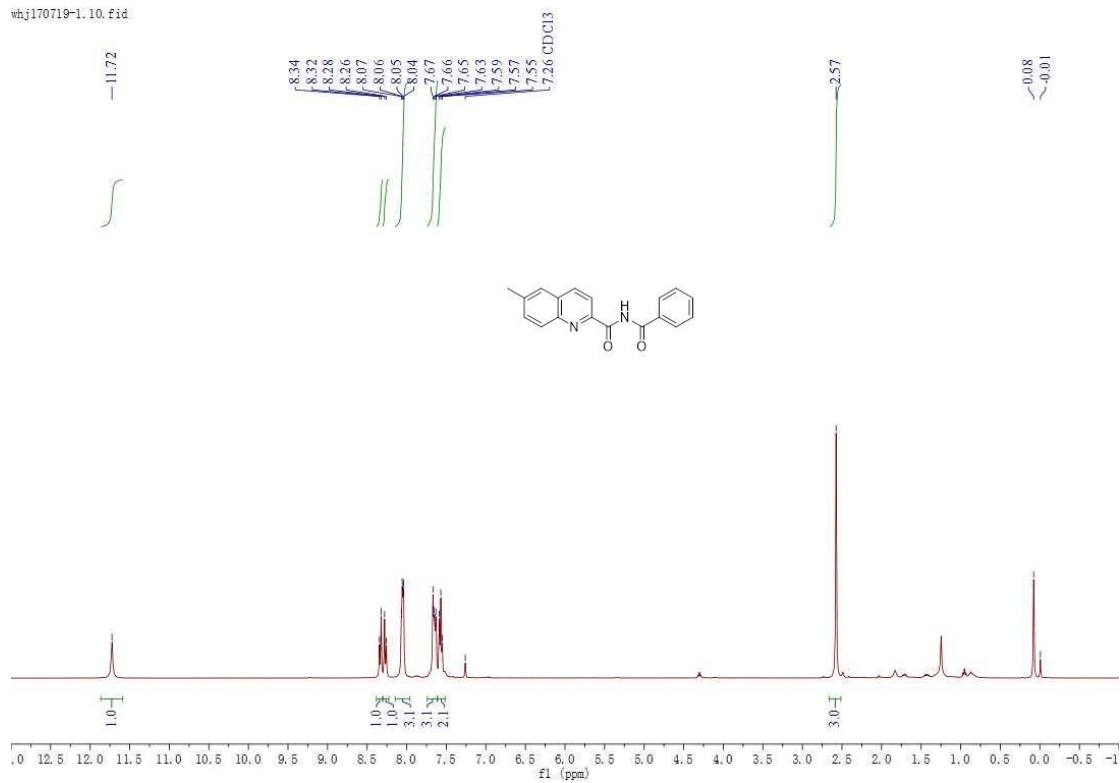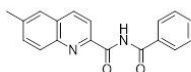

whj170719-1.20.fid

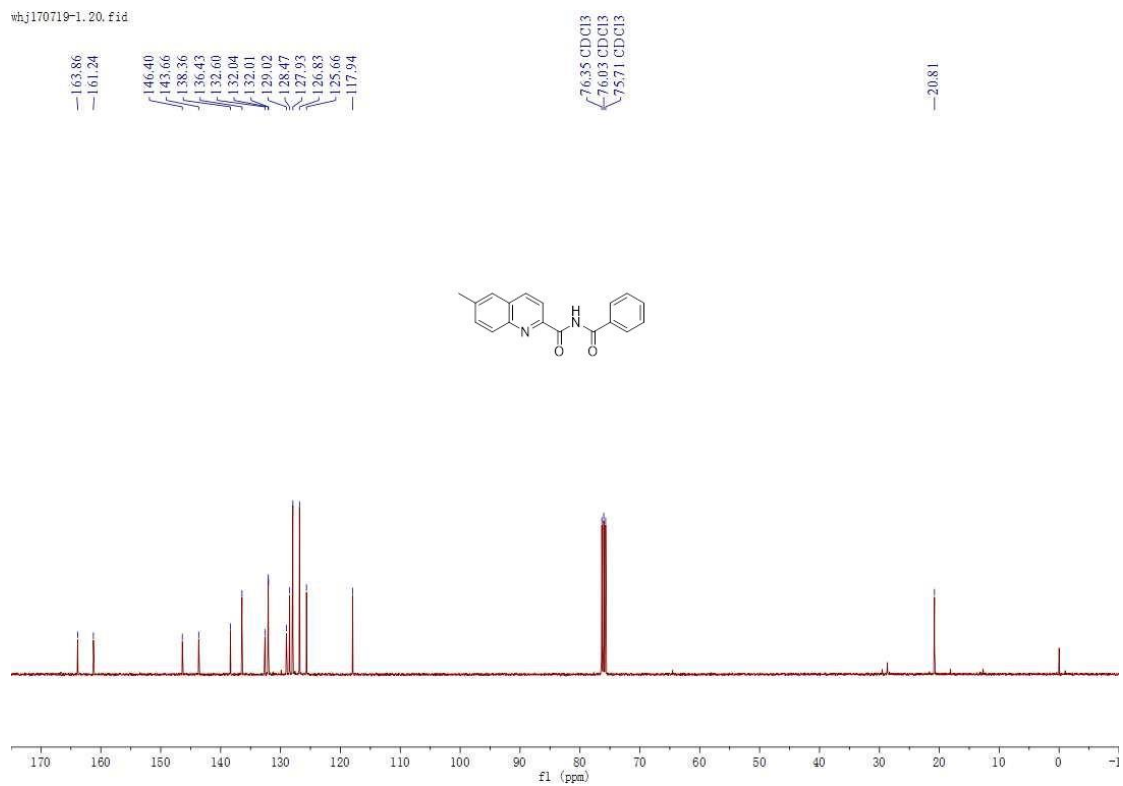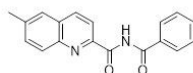

2w

fcc170804-2.10.fid

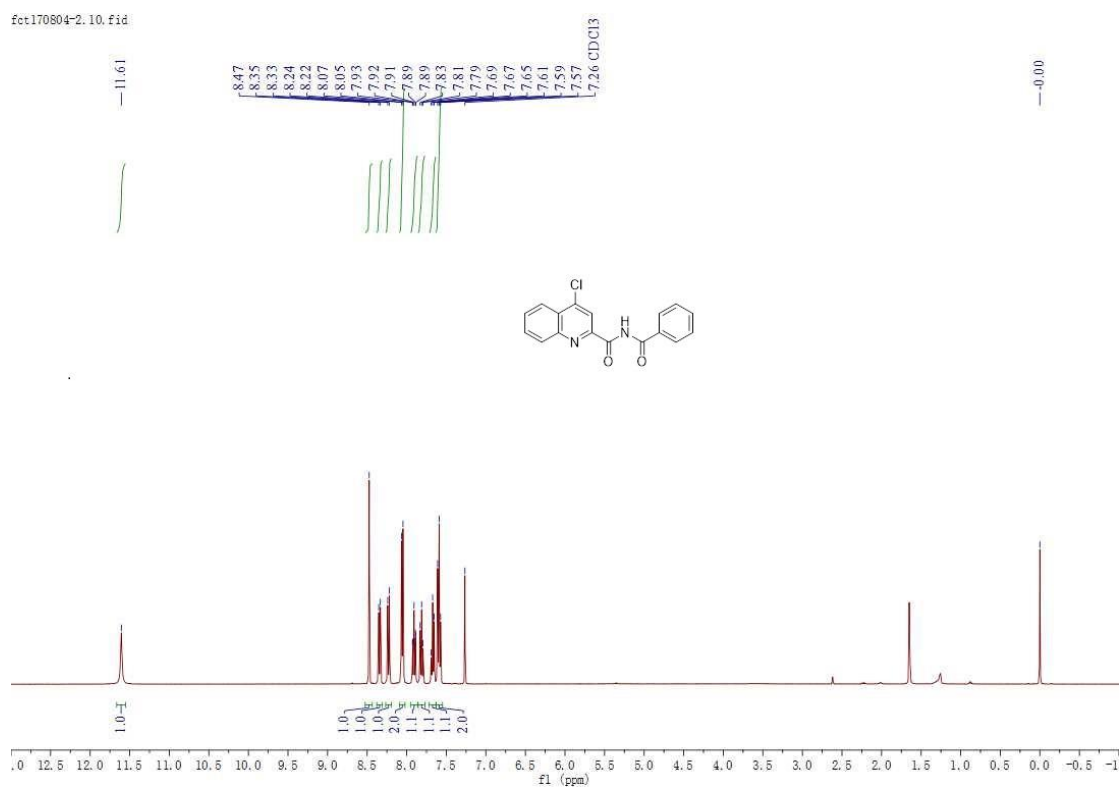

fcc170804-2.11.fid

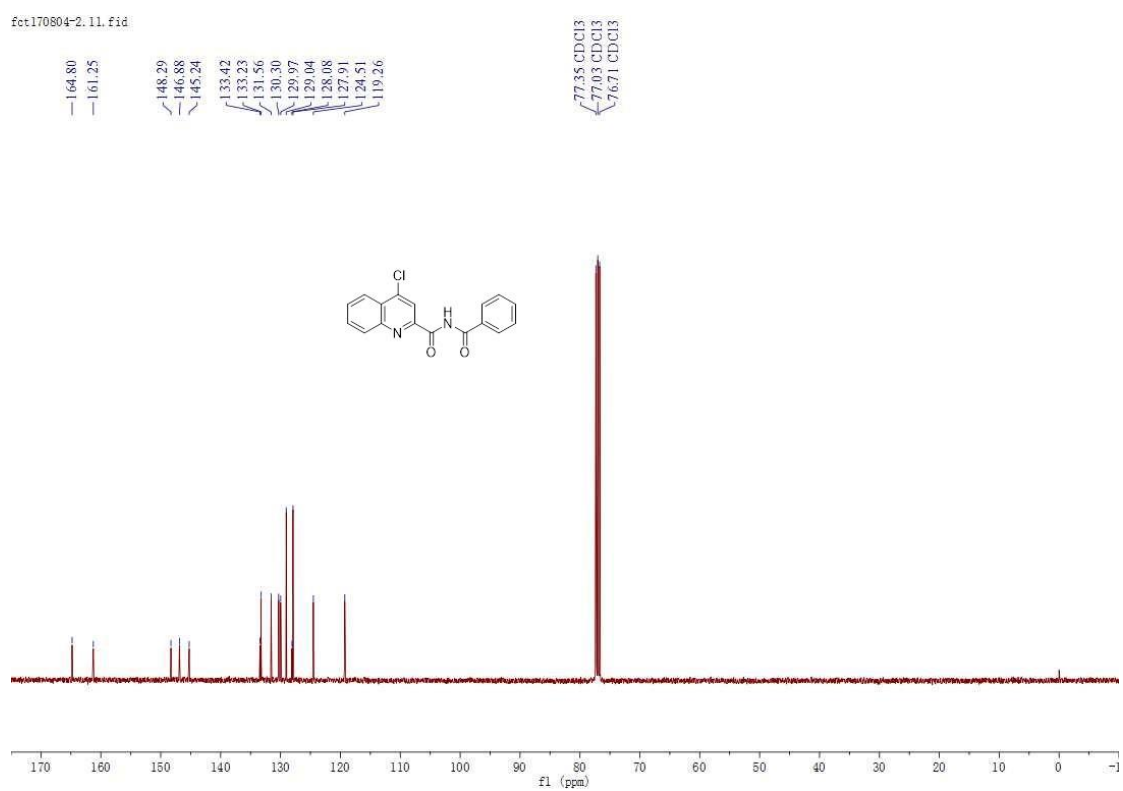

2x

CFX161221-2/1

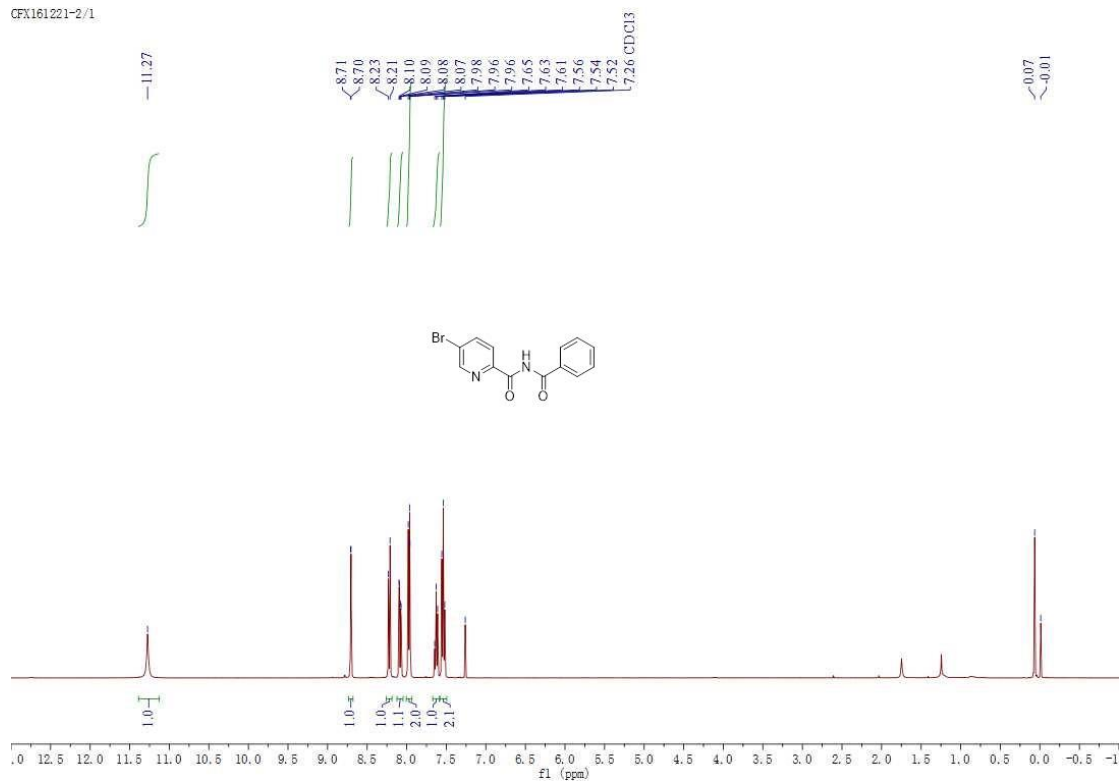

CFX161221-2/2

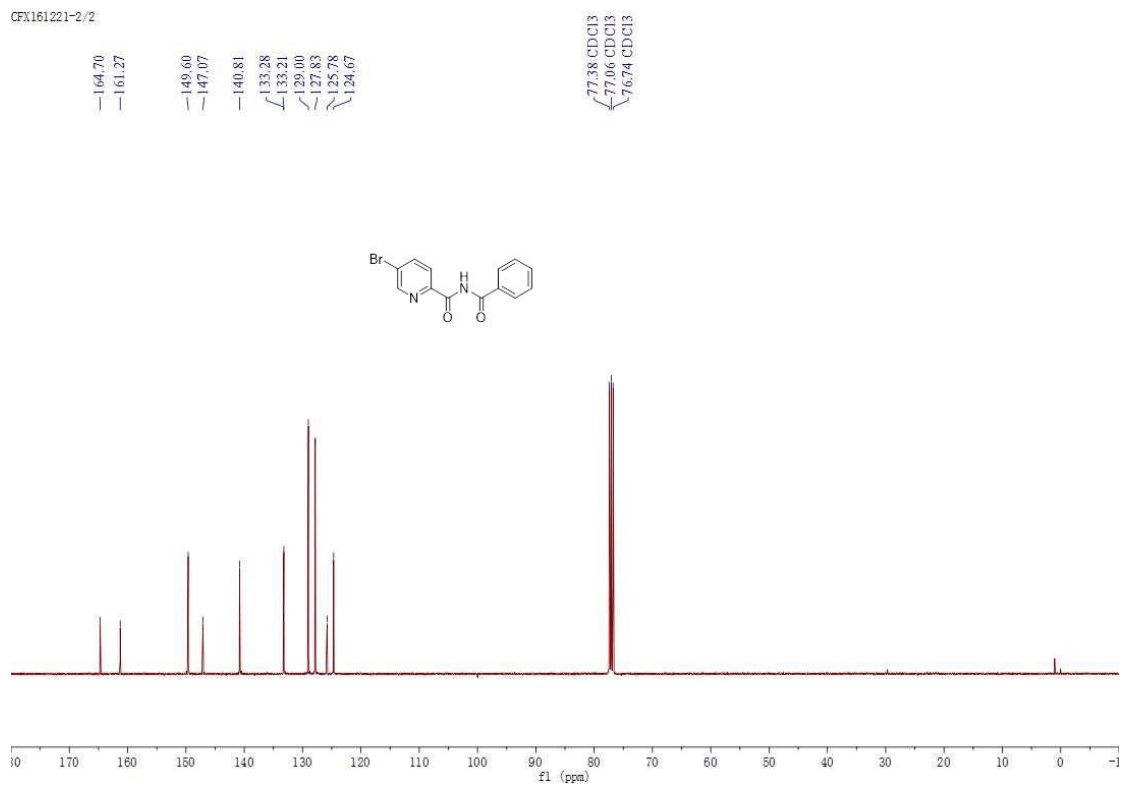

2y

CFX161221-1/1

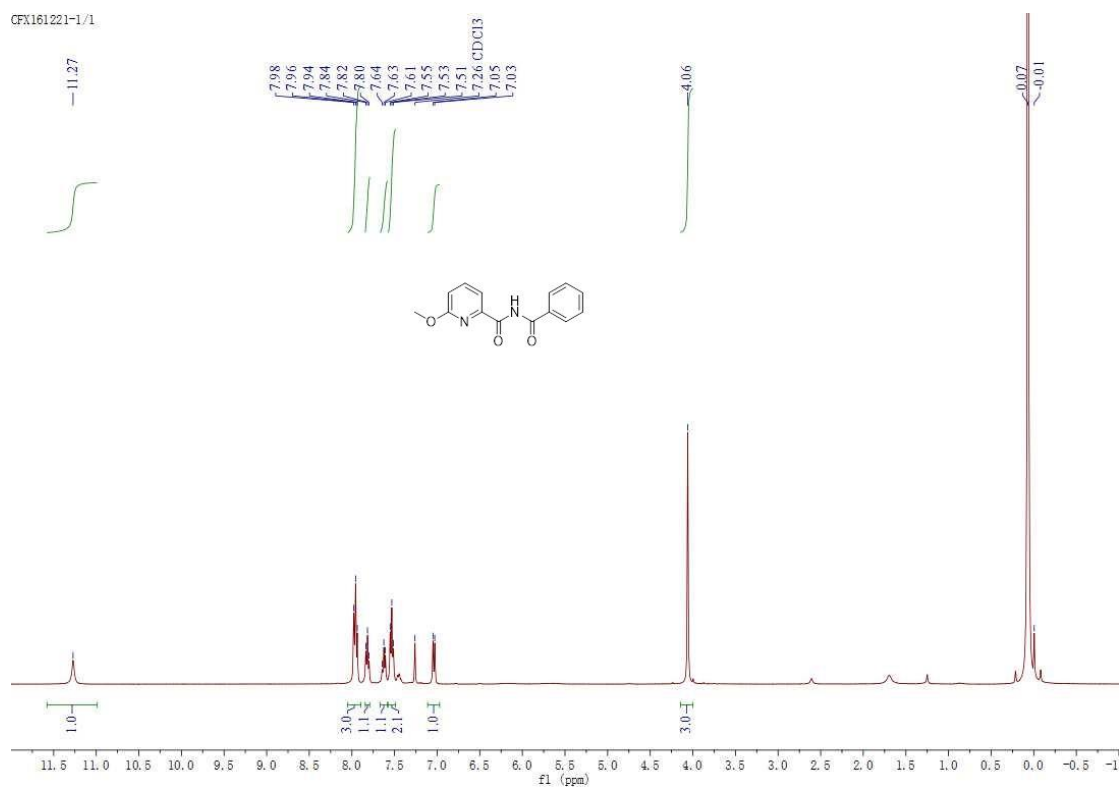

CFX161221-1/2

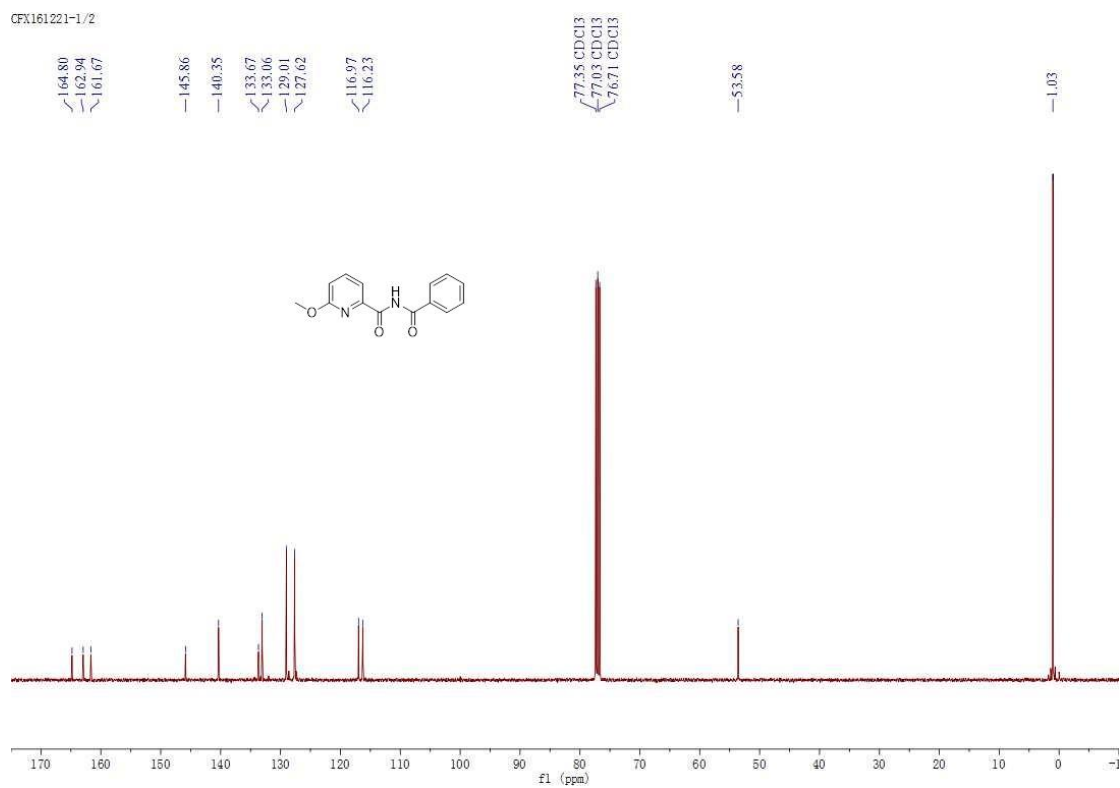

Supplement: c9ob01227c1.pdf [file c9ob01227c1.pdf]
